# Supplementary material for: Developing Prediction Models Using Near-Infrared Spectroscopy to Quantify Cannabinoid Content in Cannabis Sativa
Source: MDPI journal article supplement (doi:10.3390/s23052607), 2023-02-27

Figure S1: Histogram plots of all cannabinoids by harvest group (HG1: n = 479, HG2: n = 126, HG 3: n = 78, HG4: n = 51).

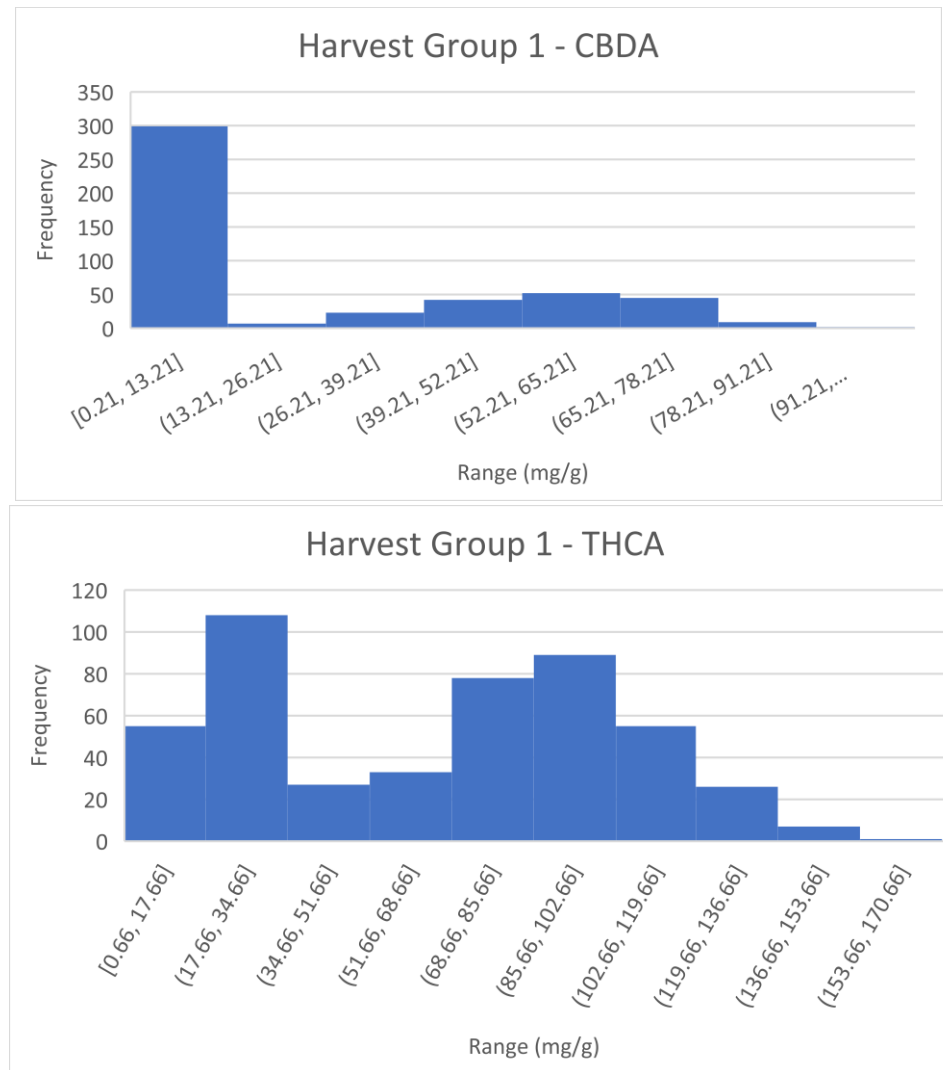

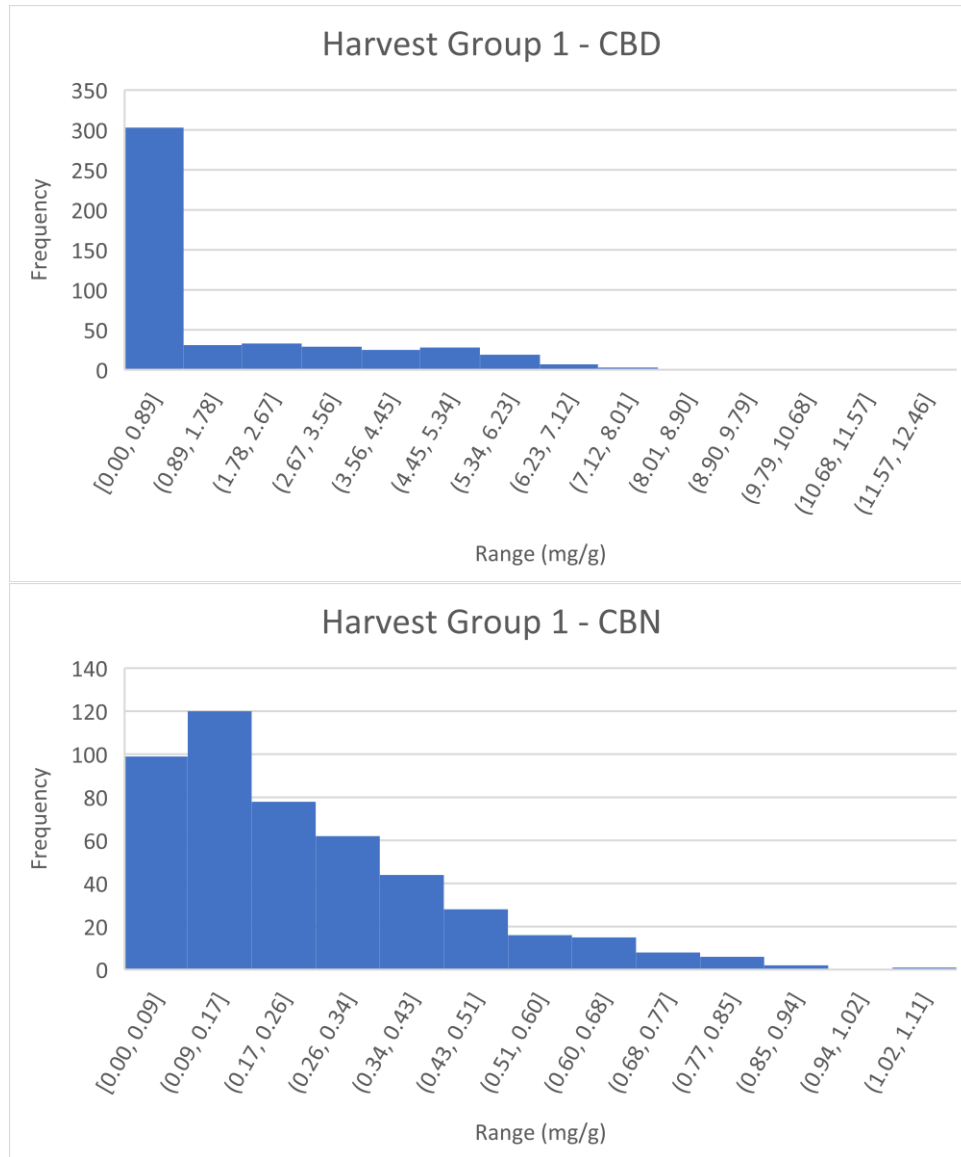

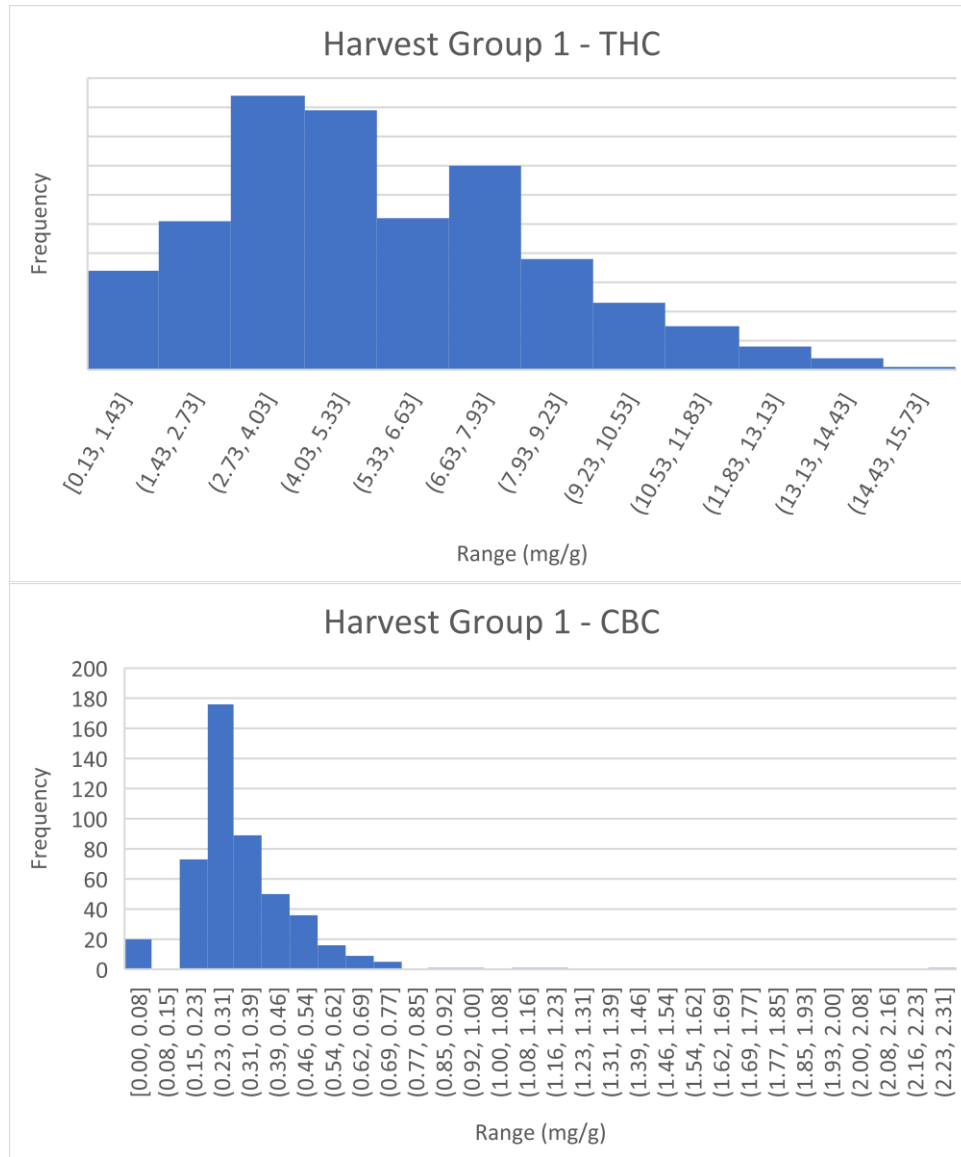

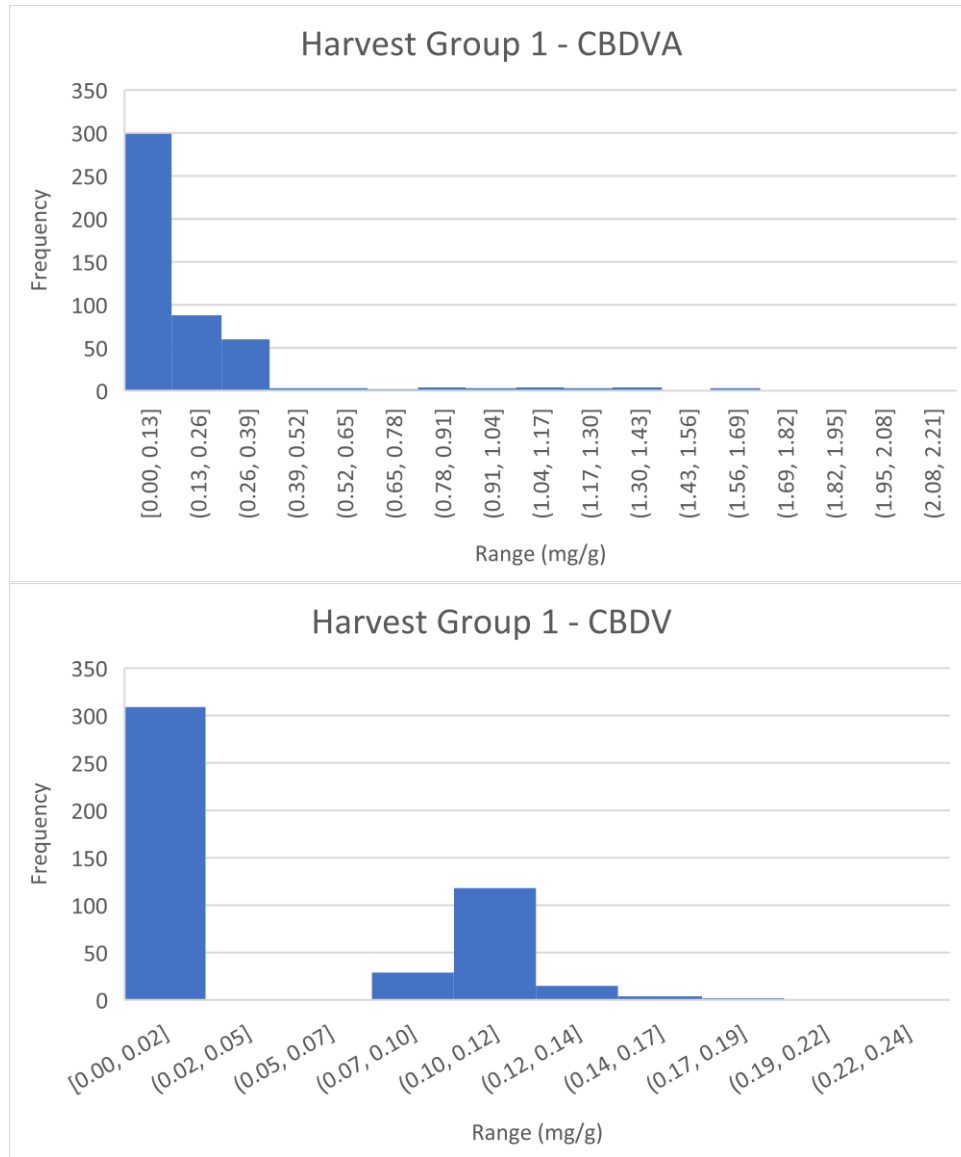

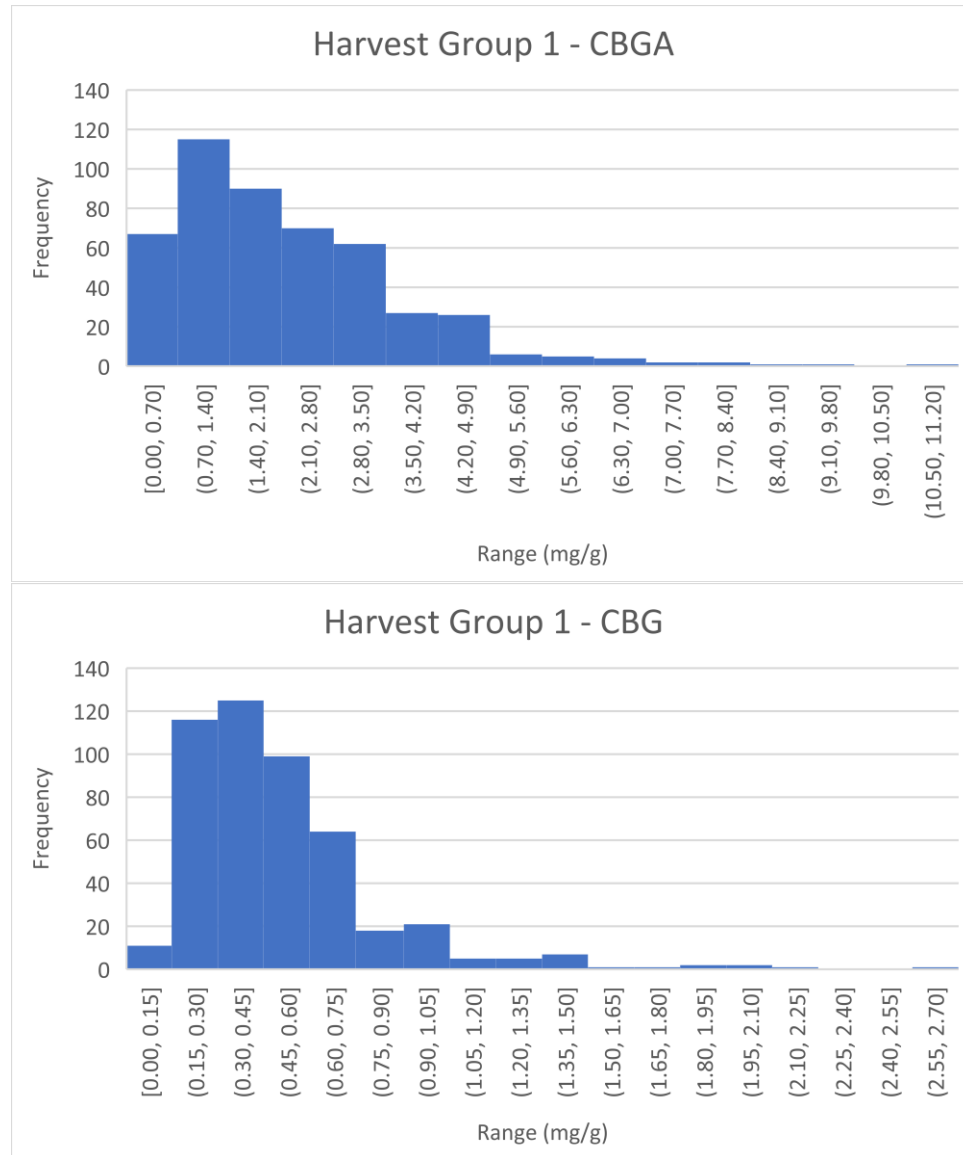

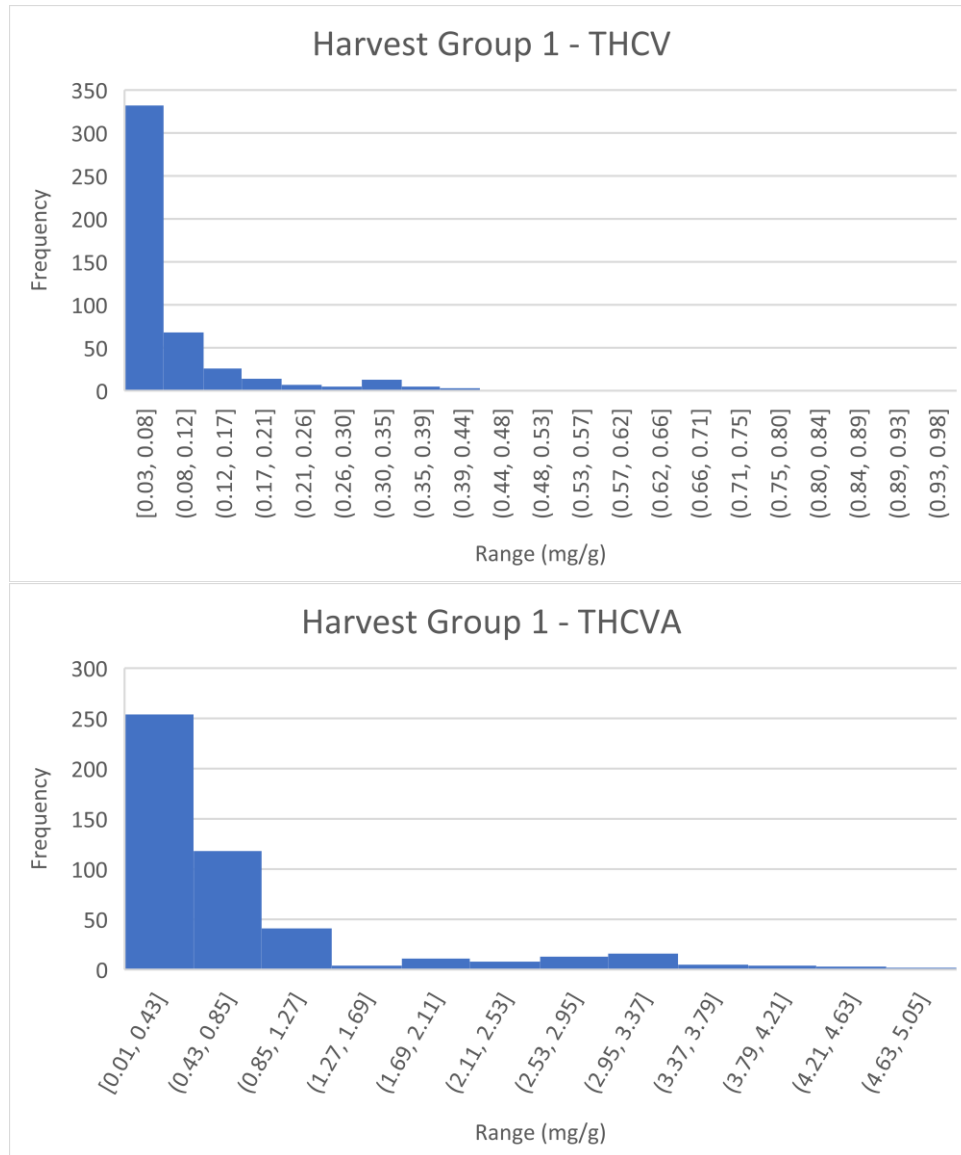

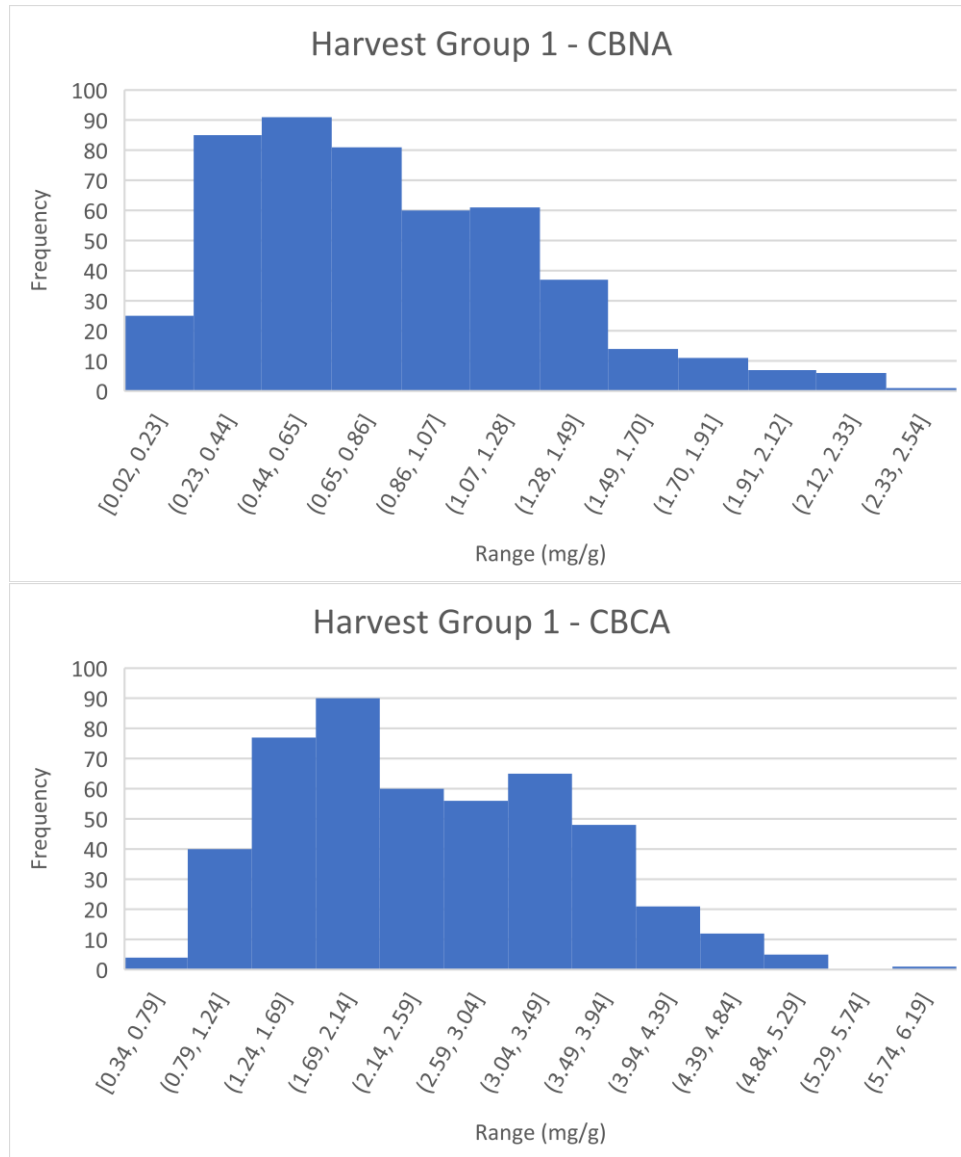

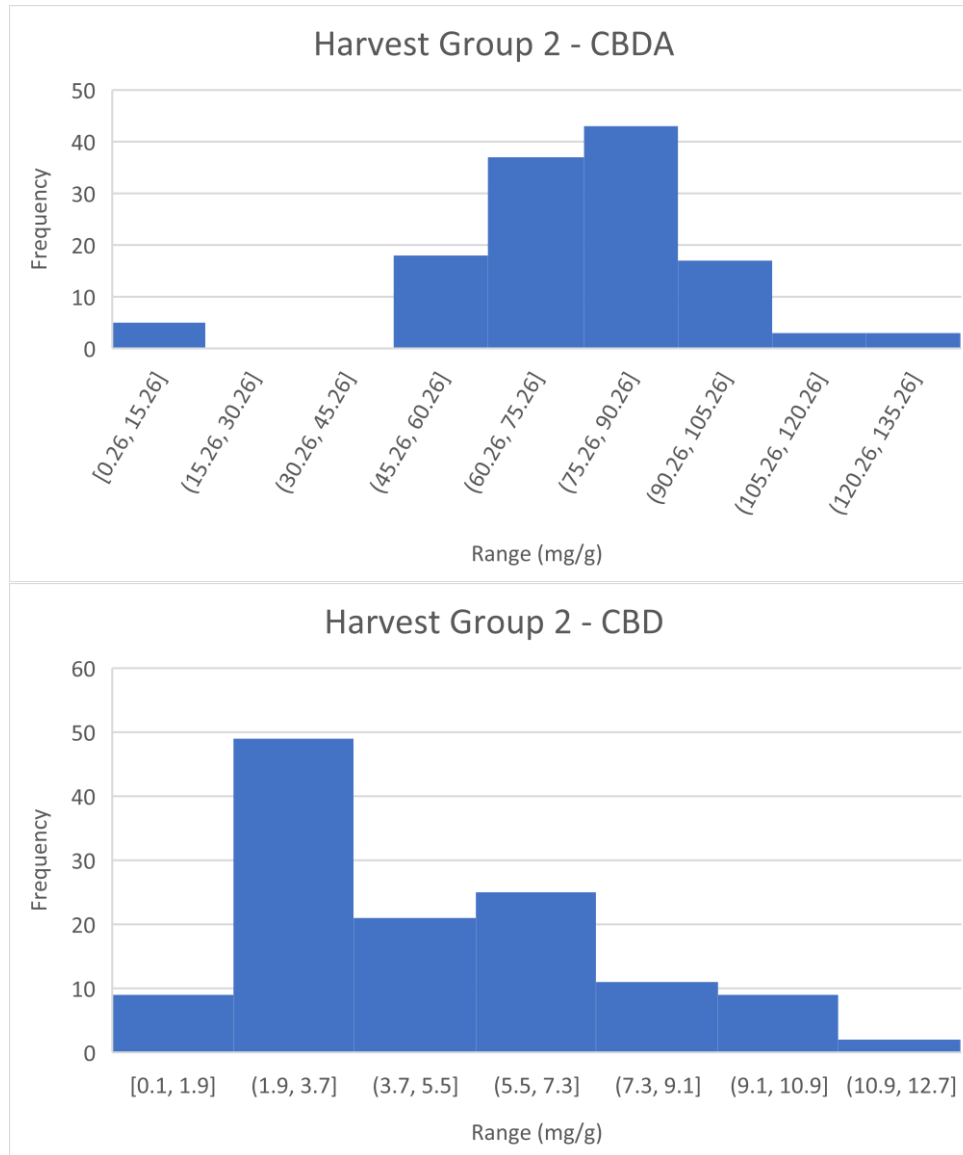



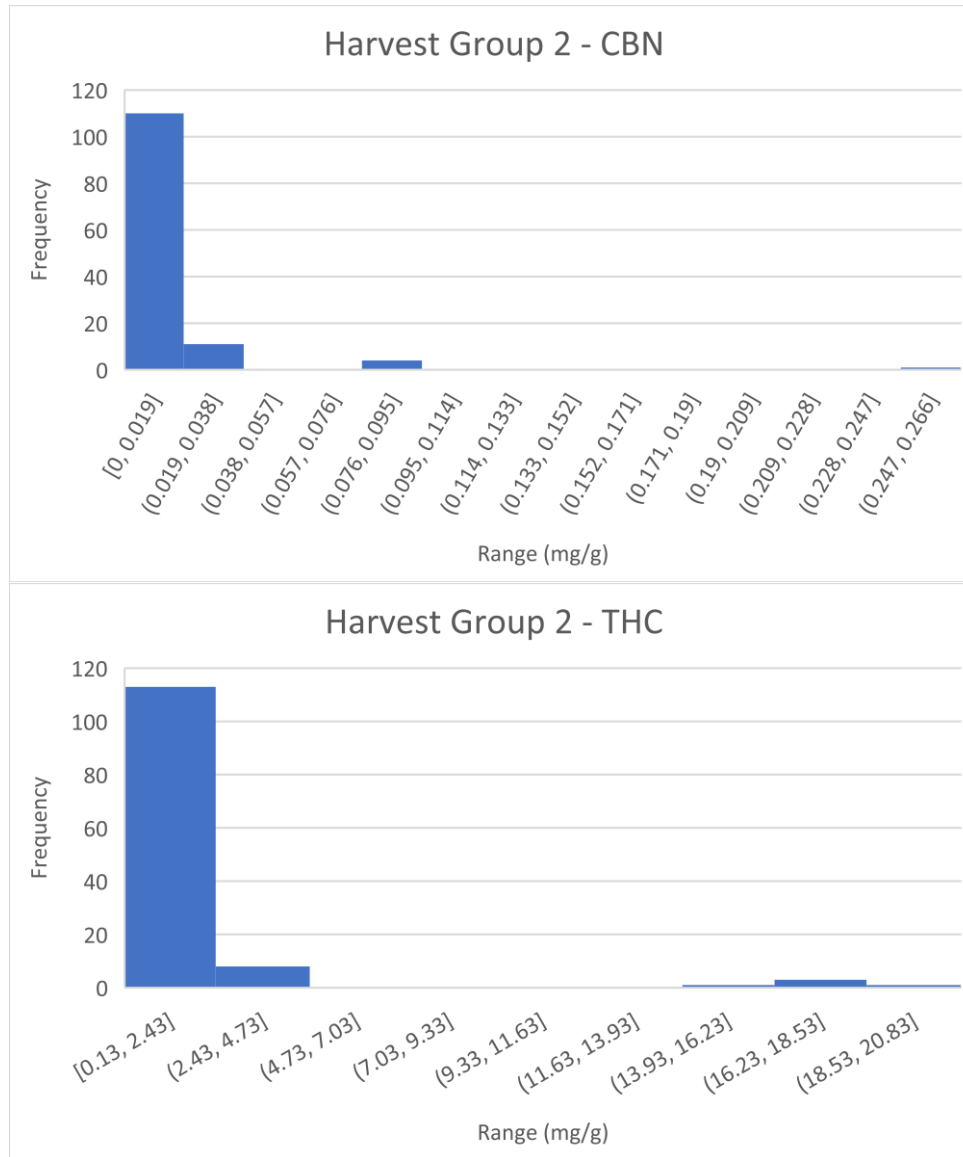

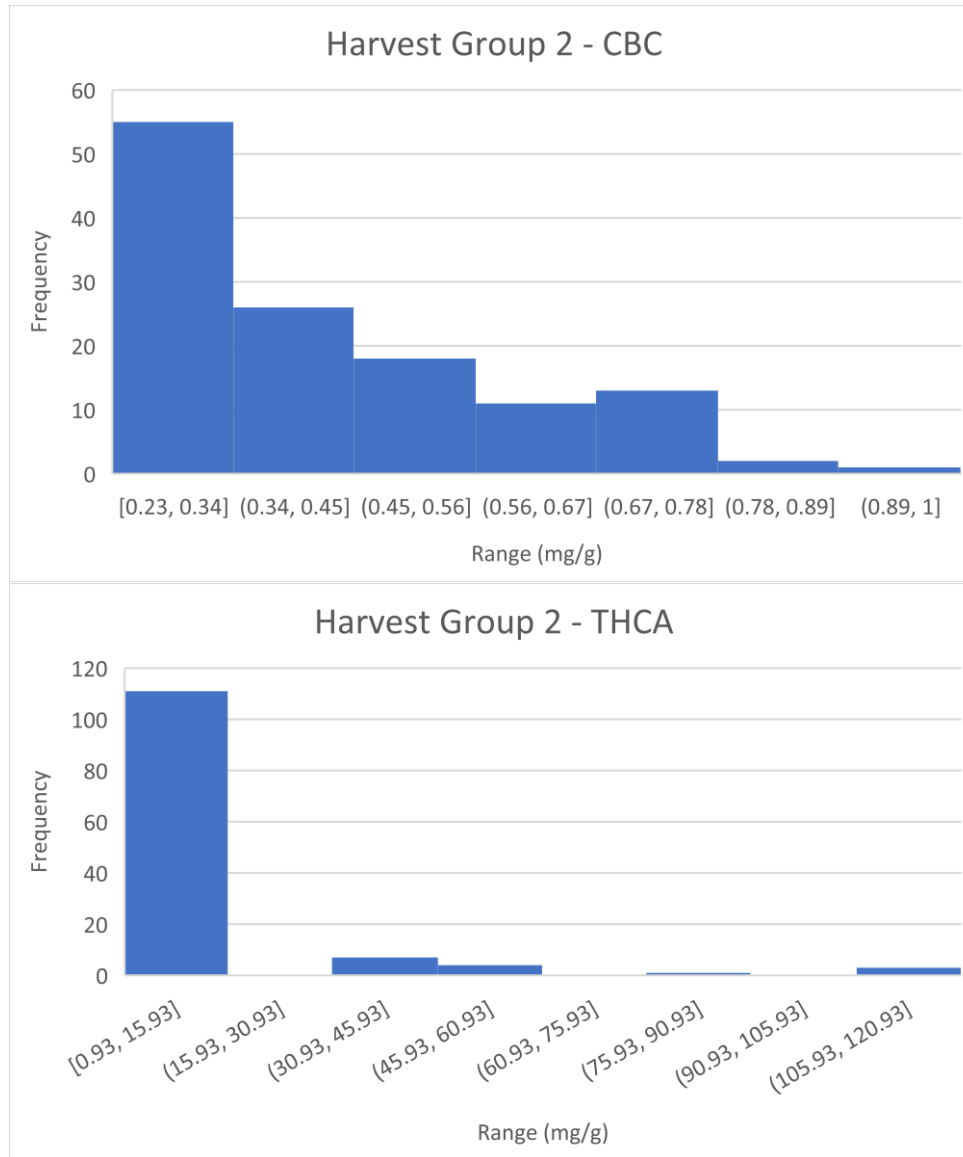

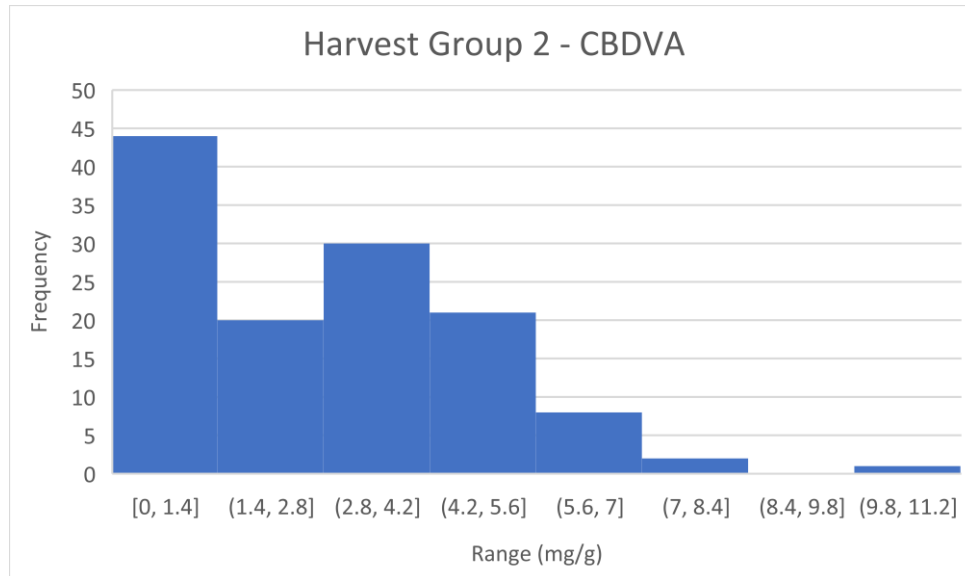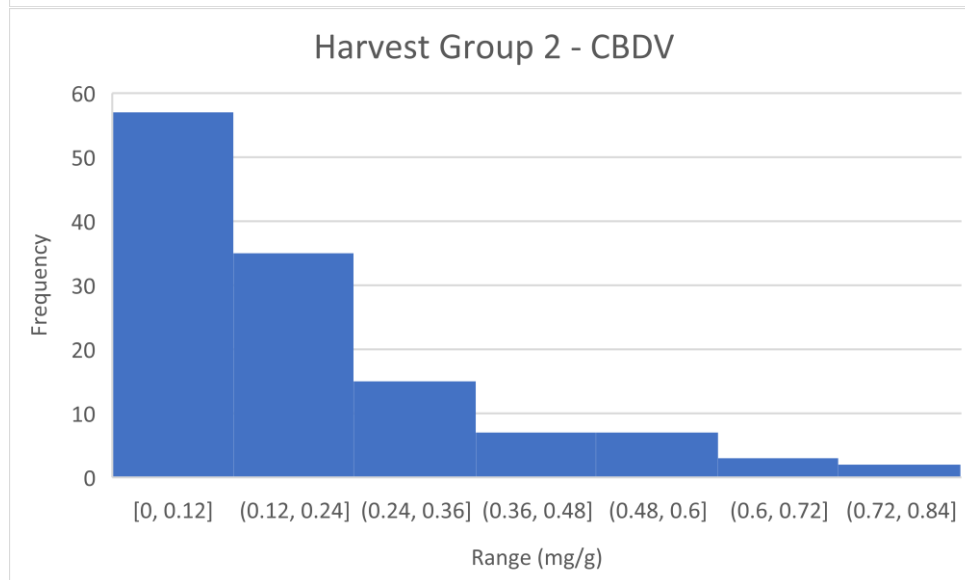

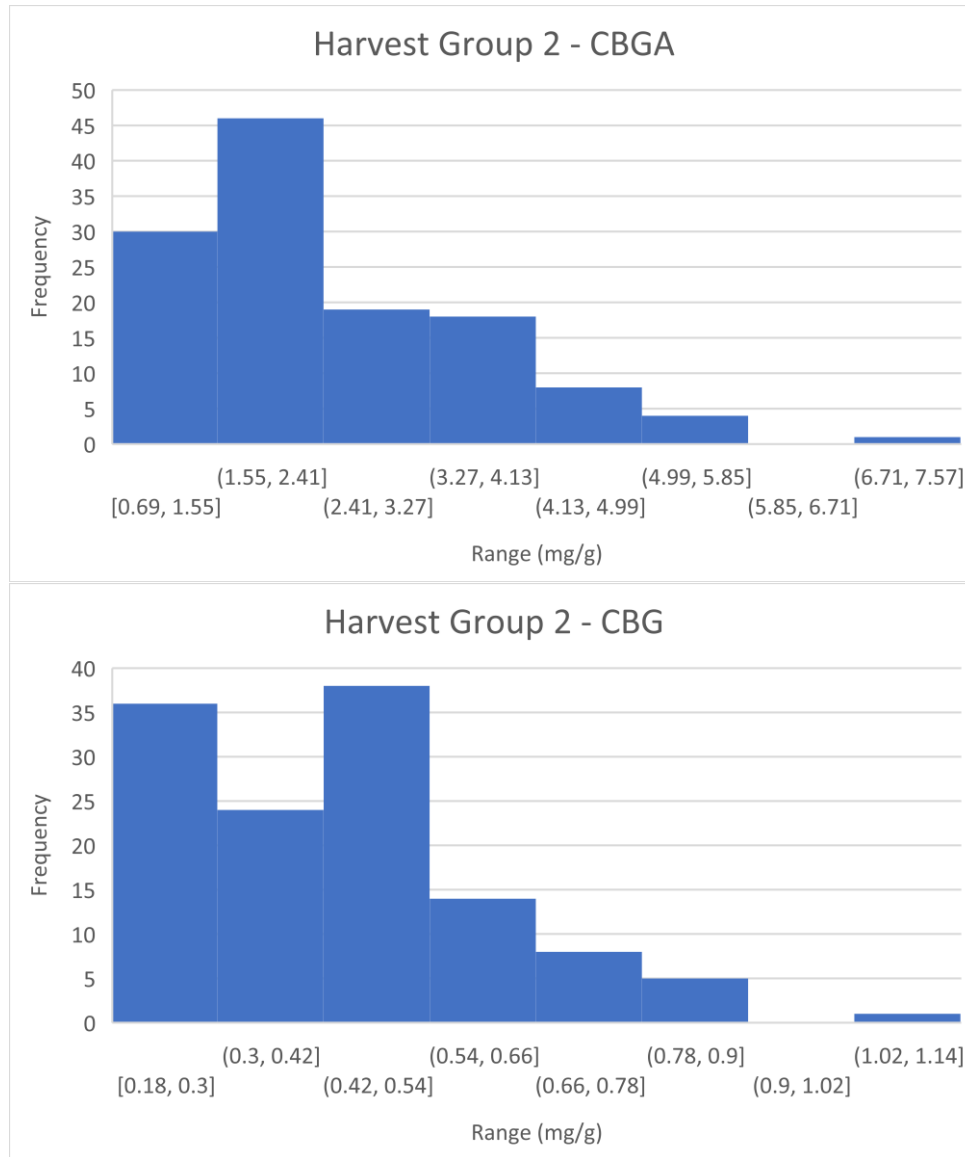

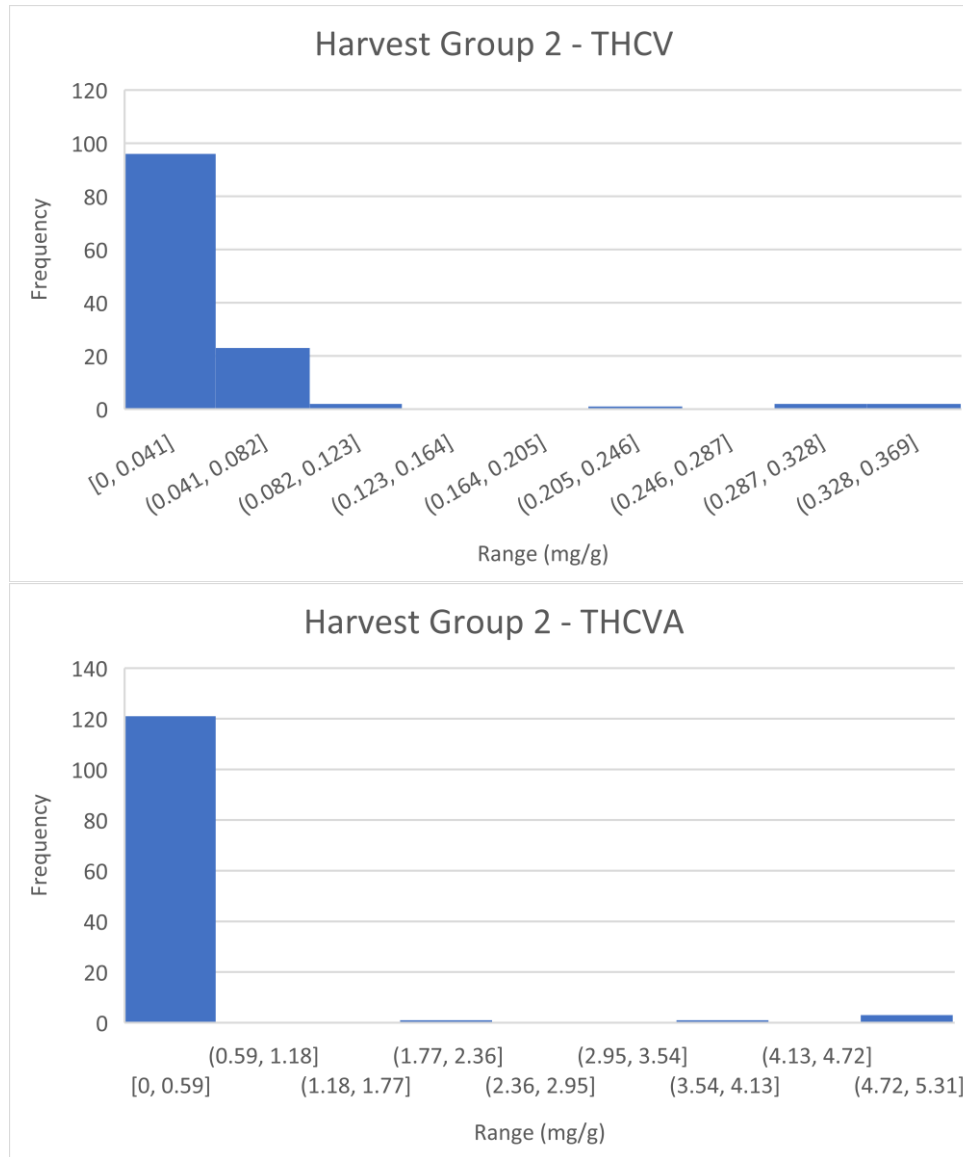

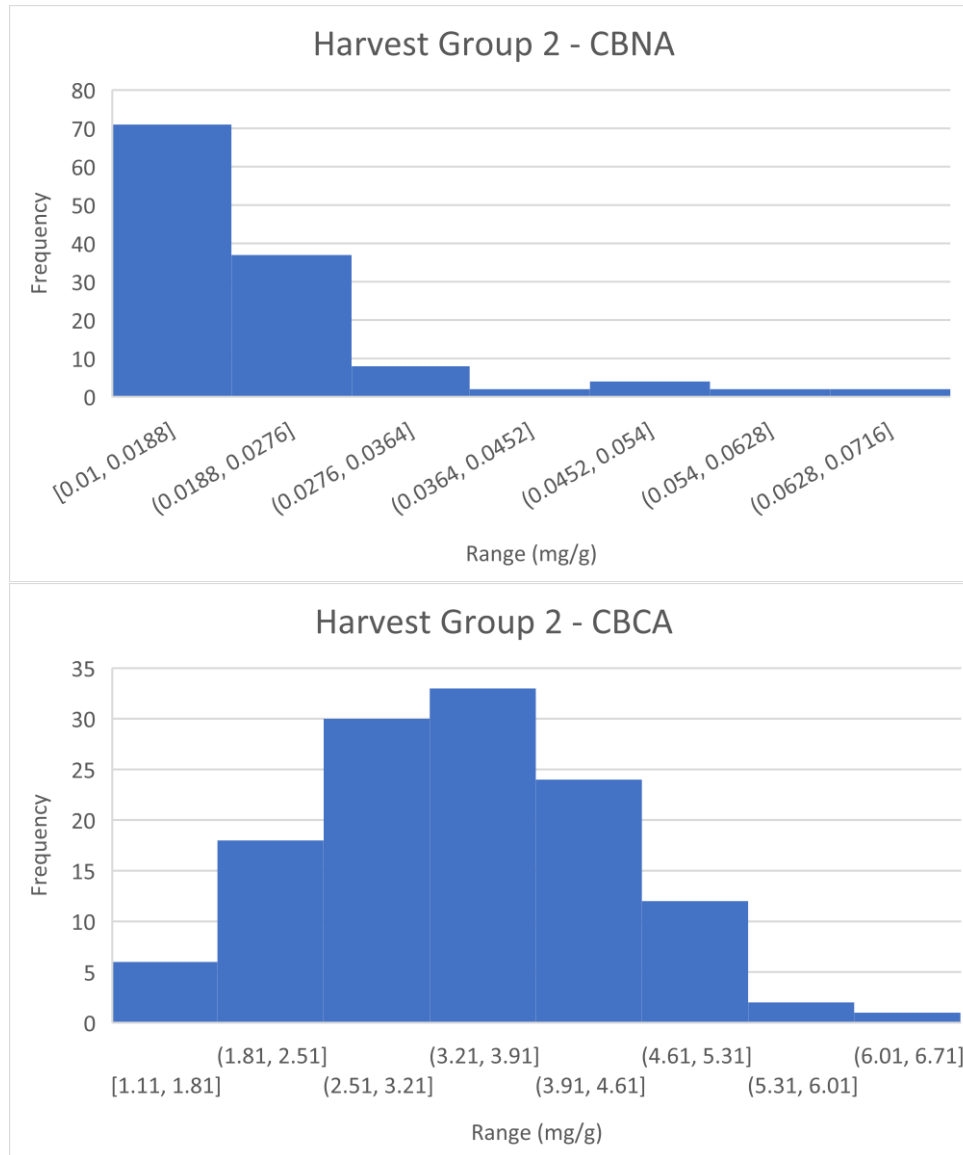

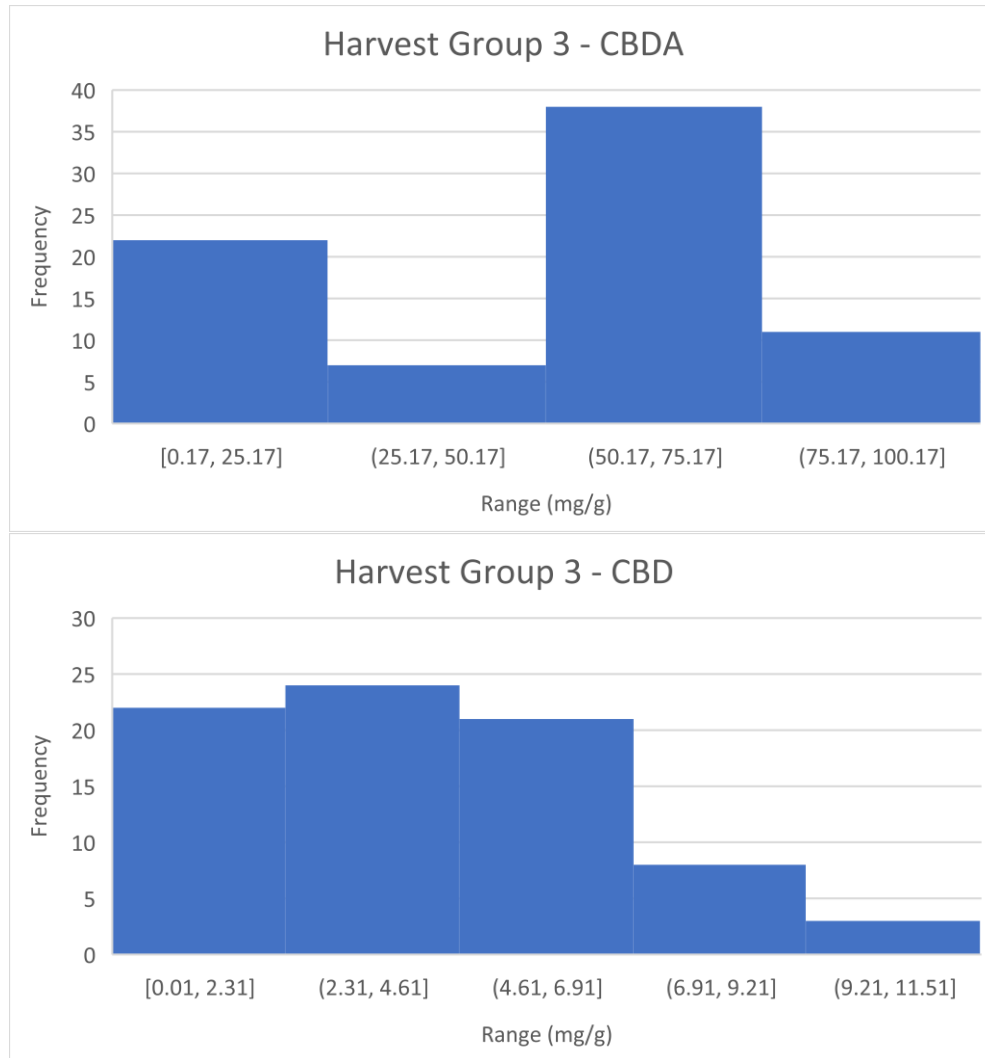

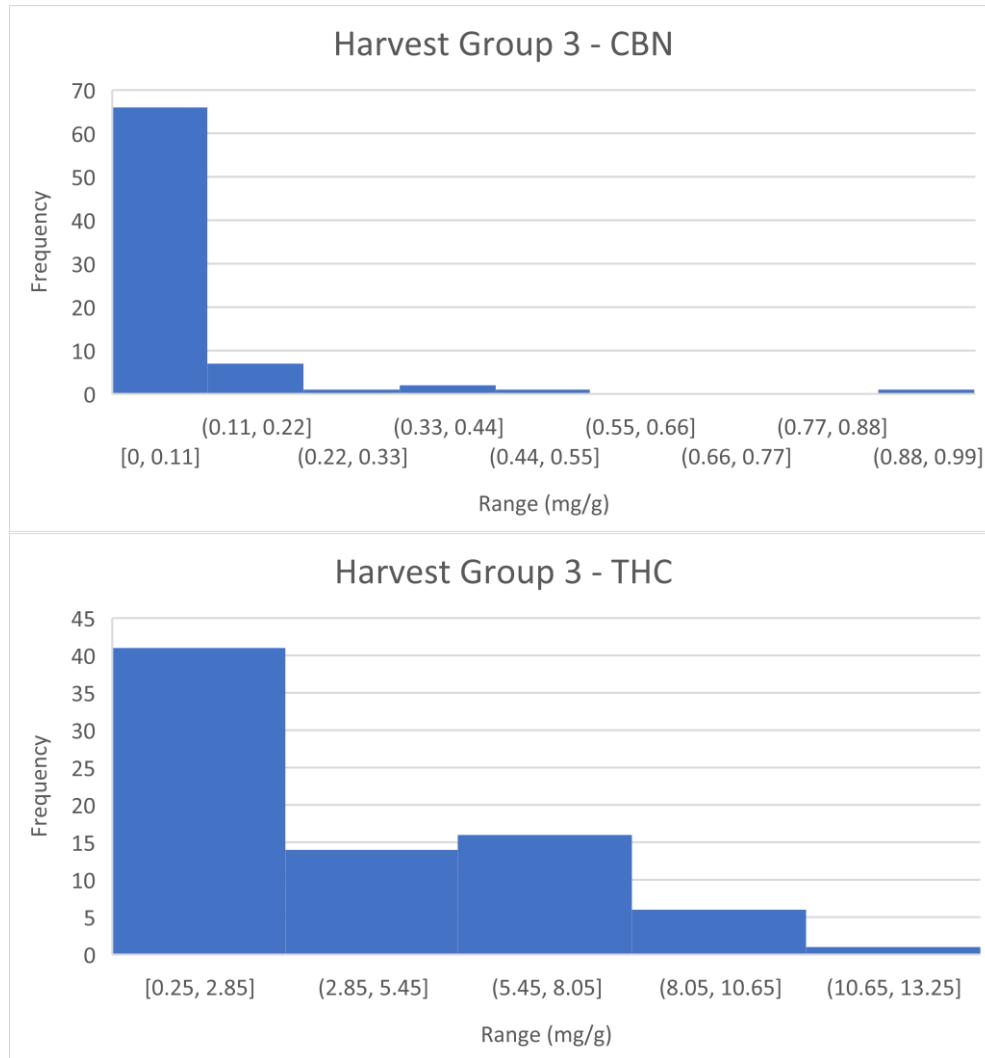



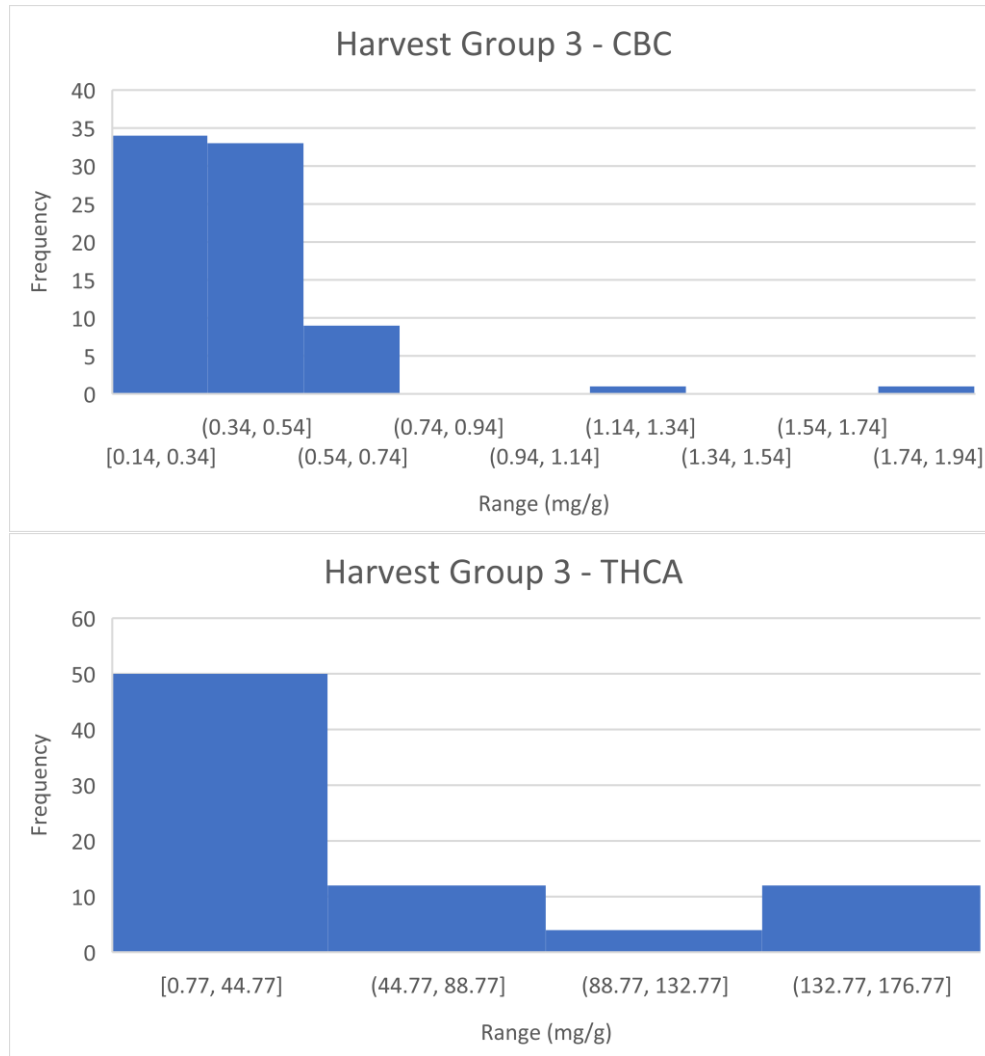

OFFICIAL

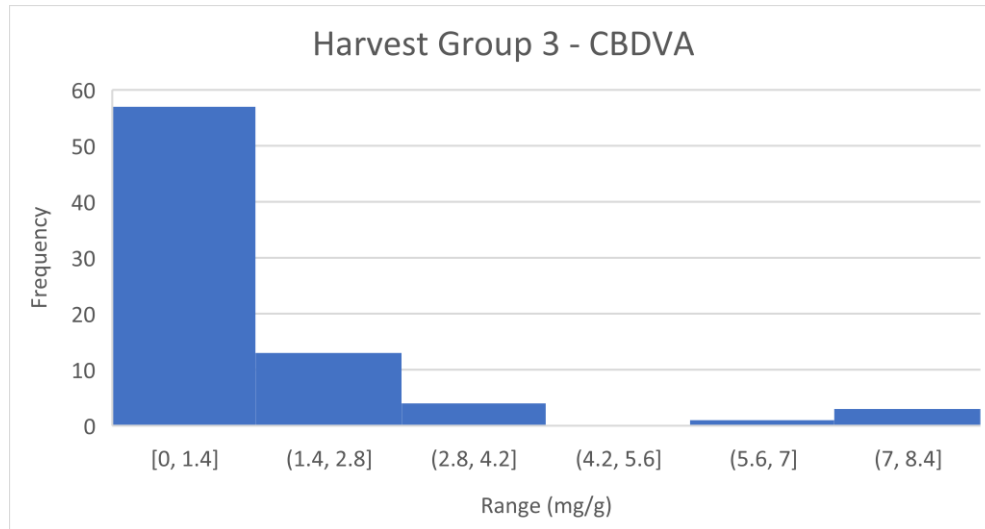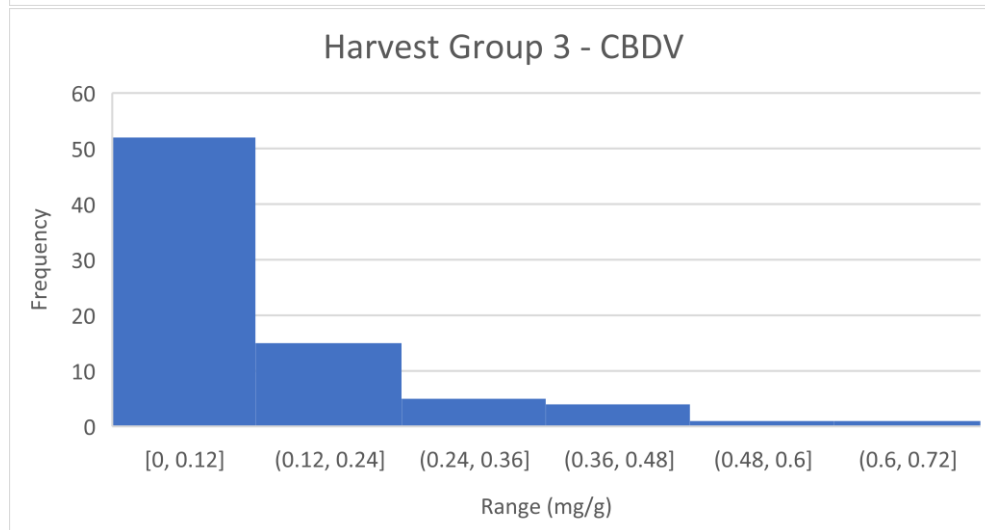

OFFICIAL

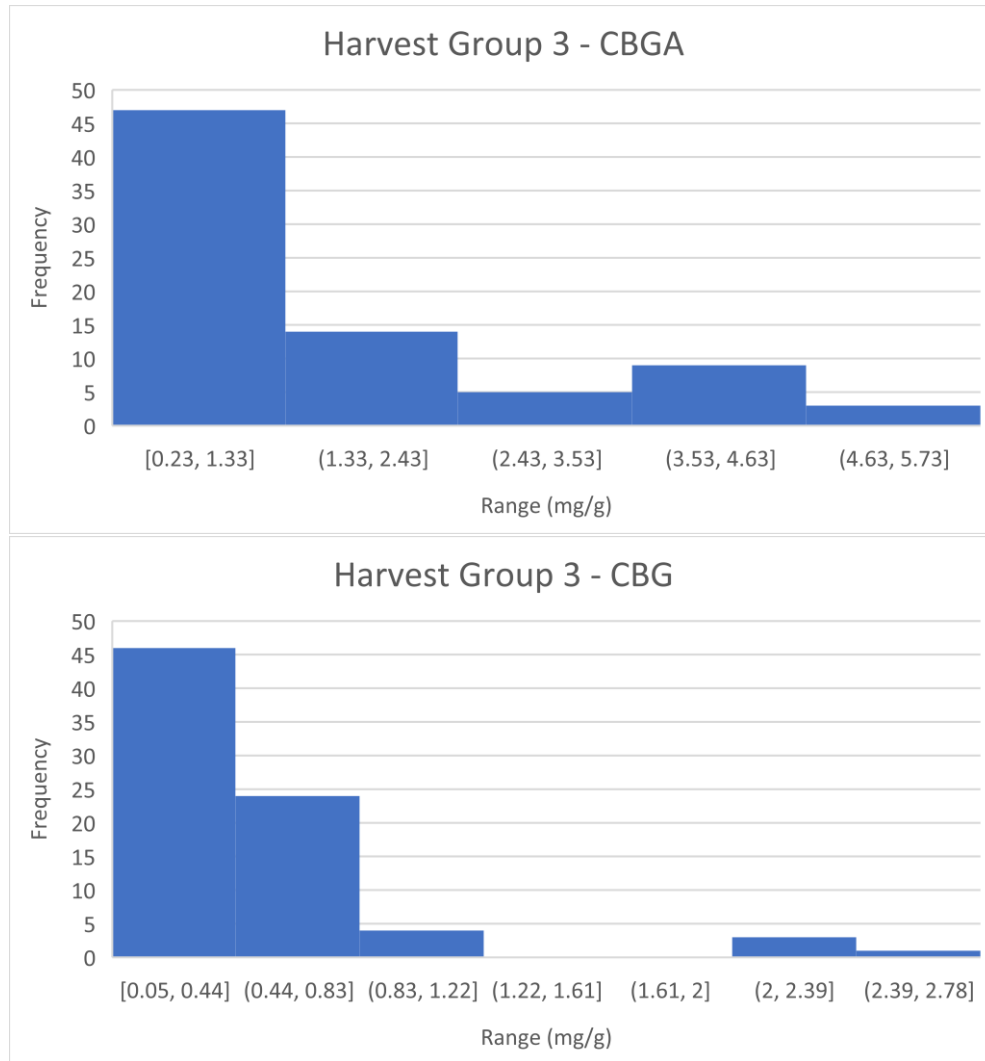

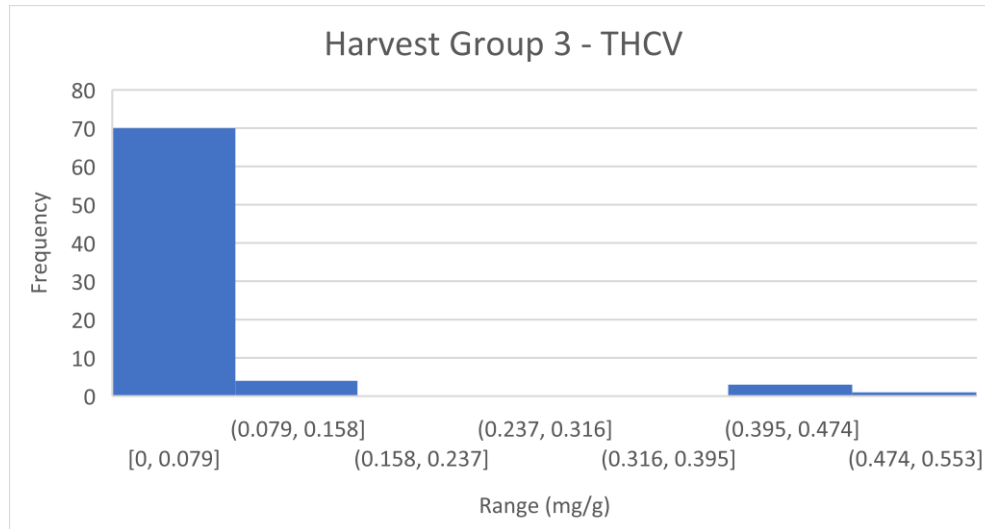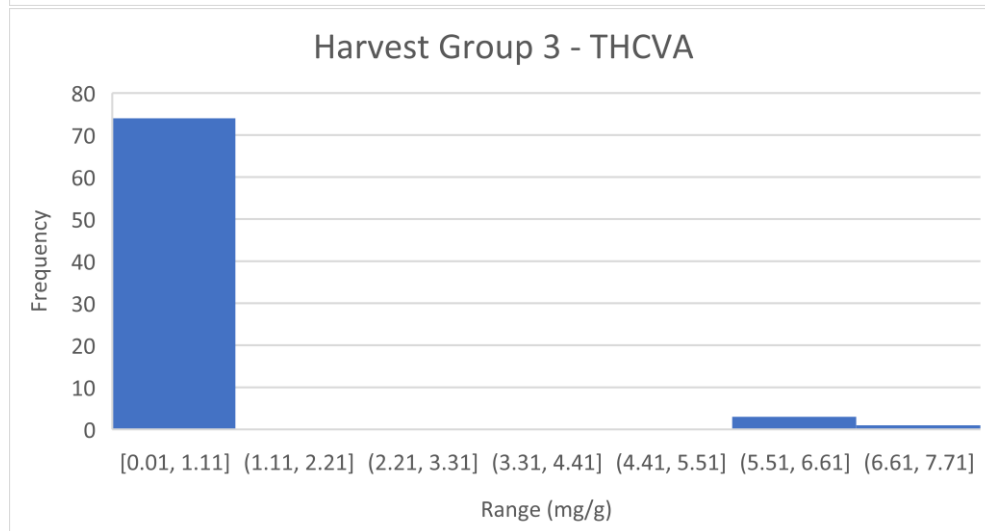

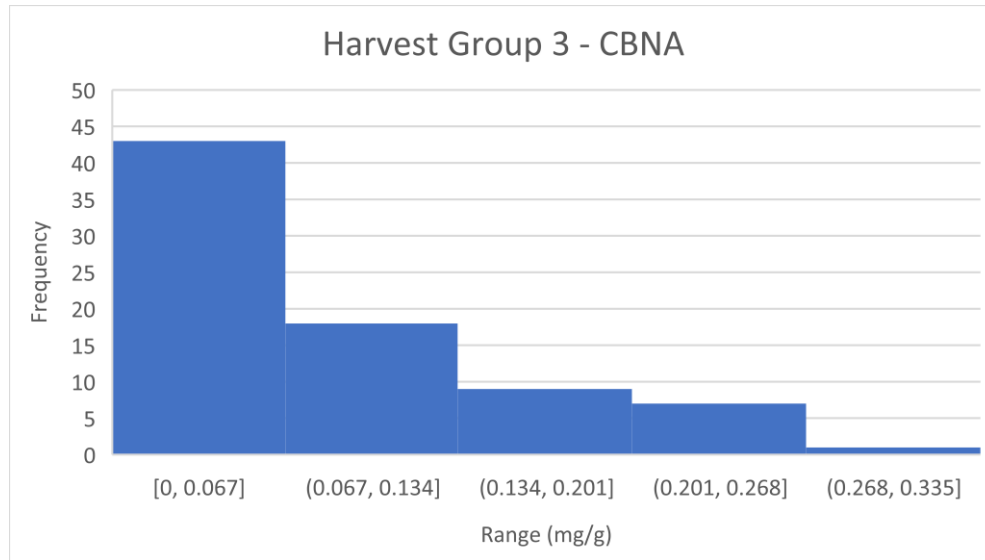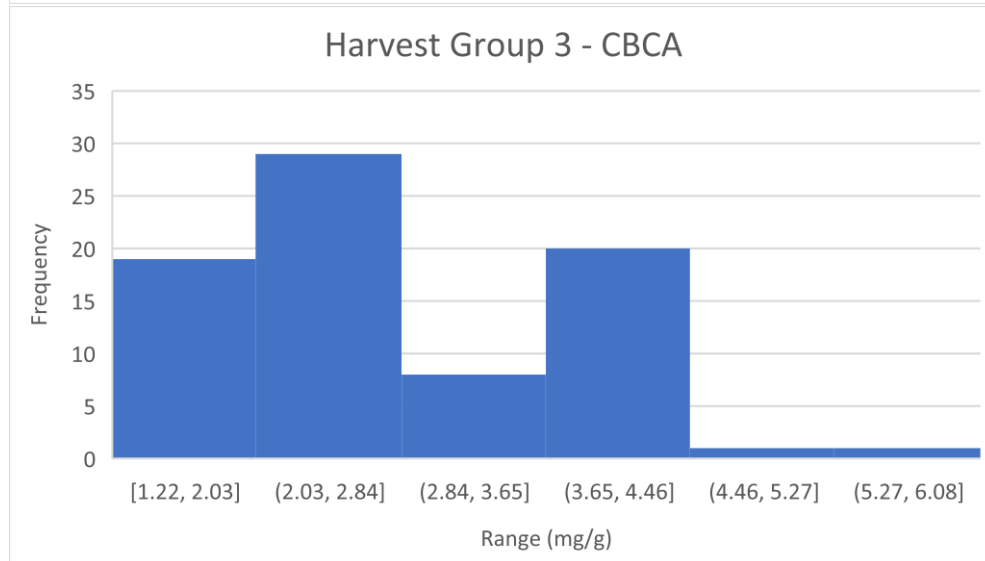

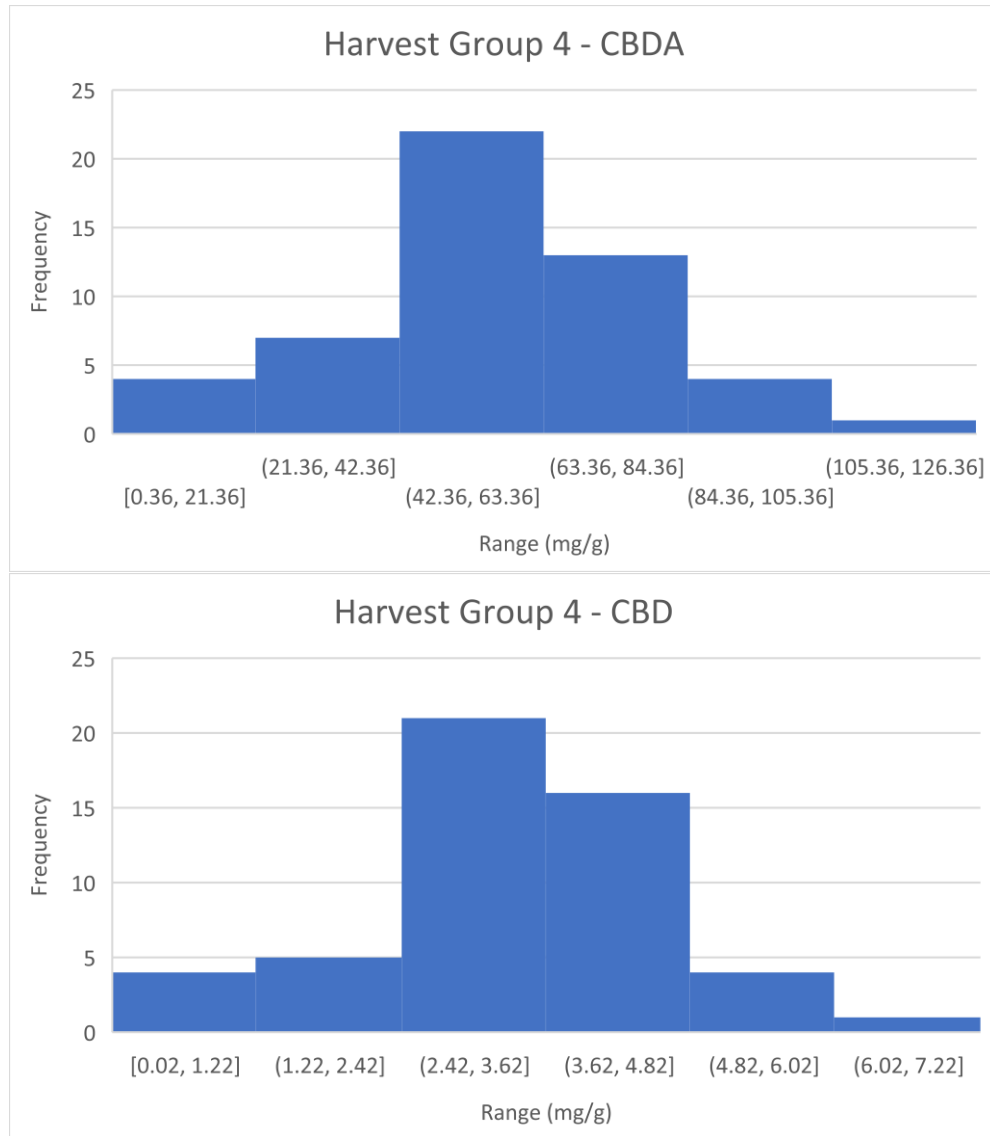

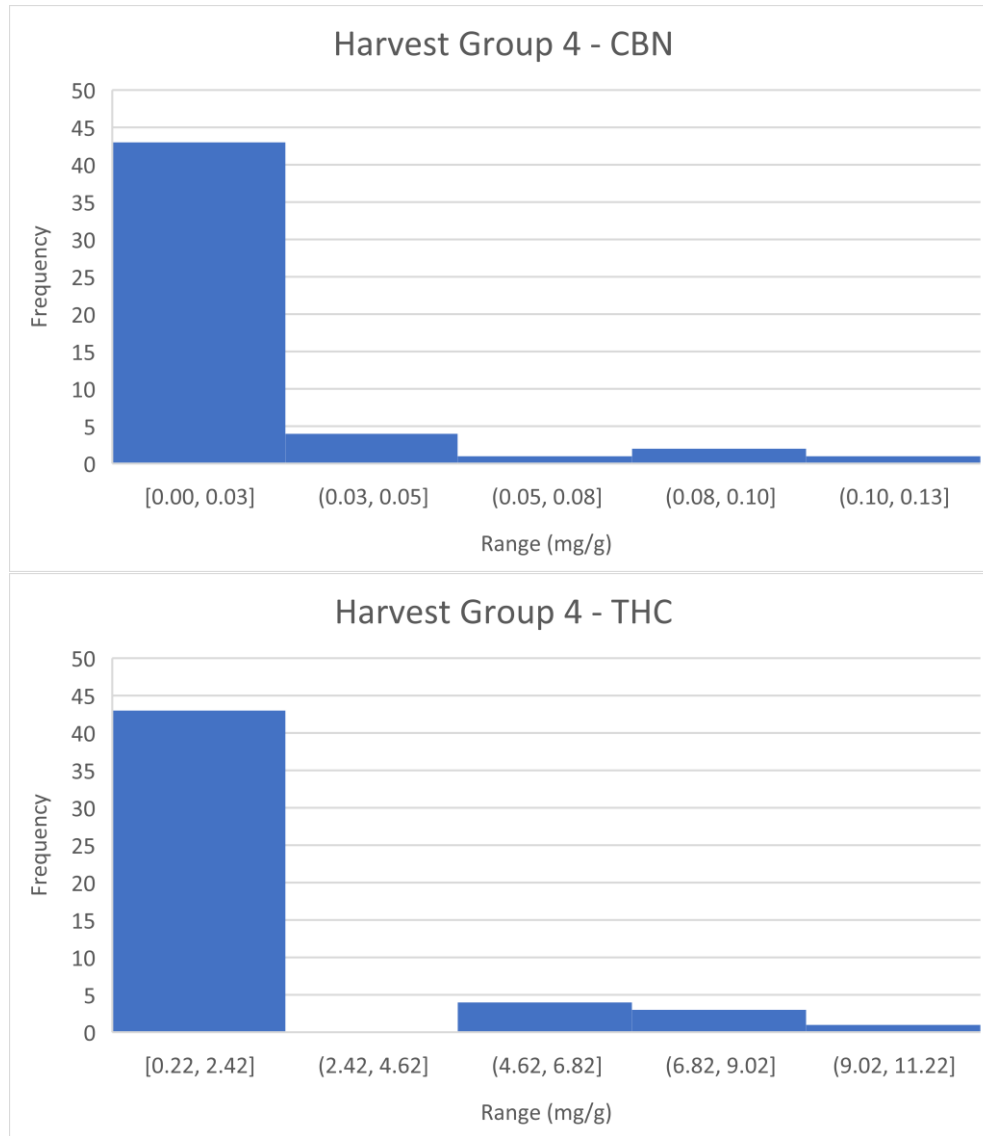

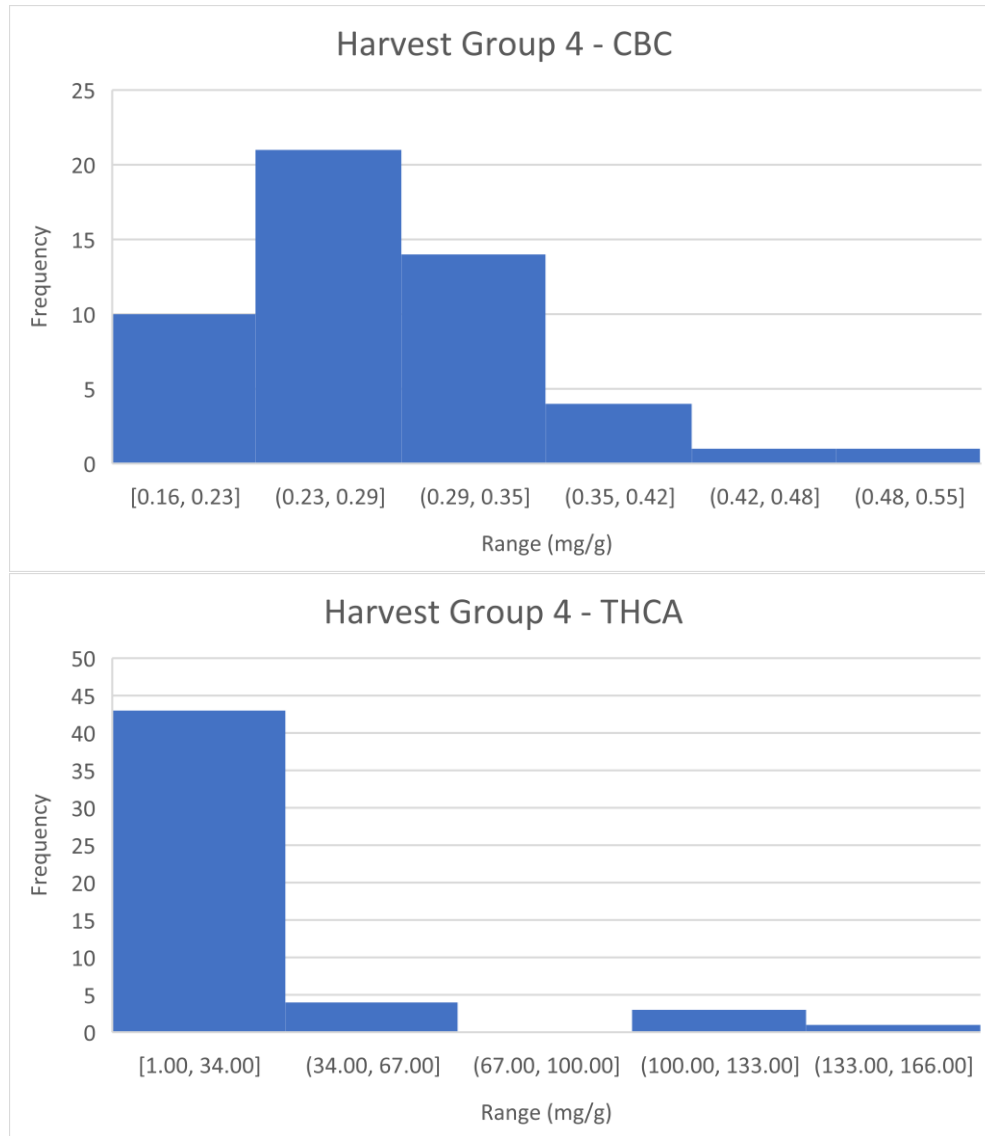



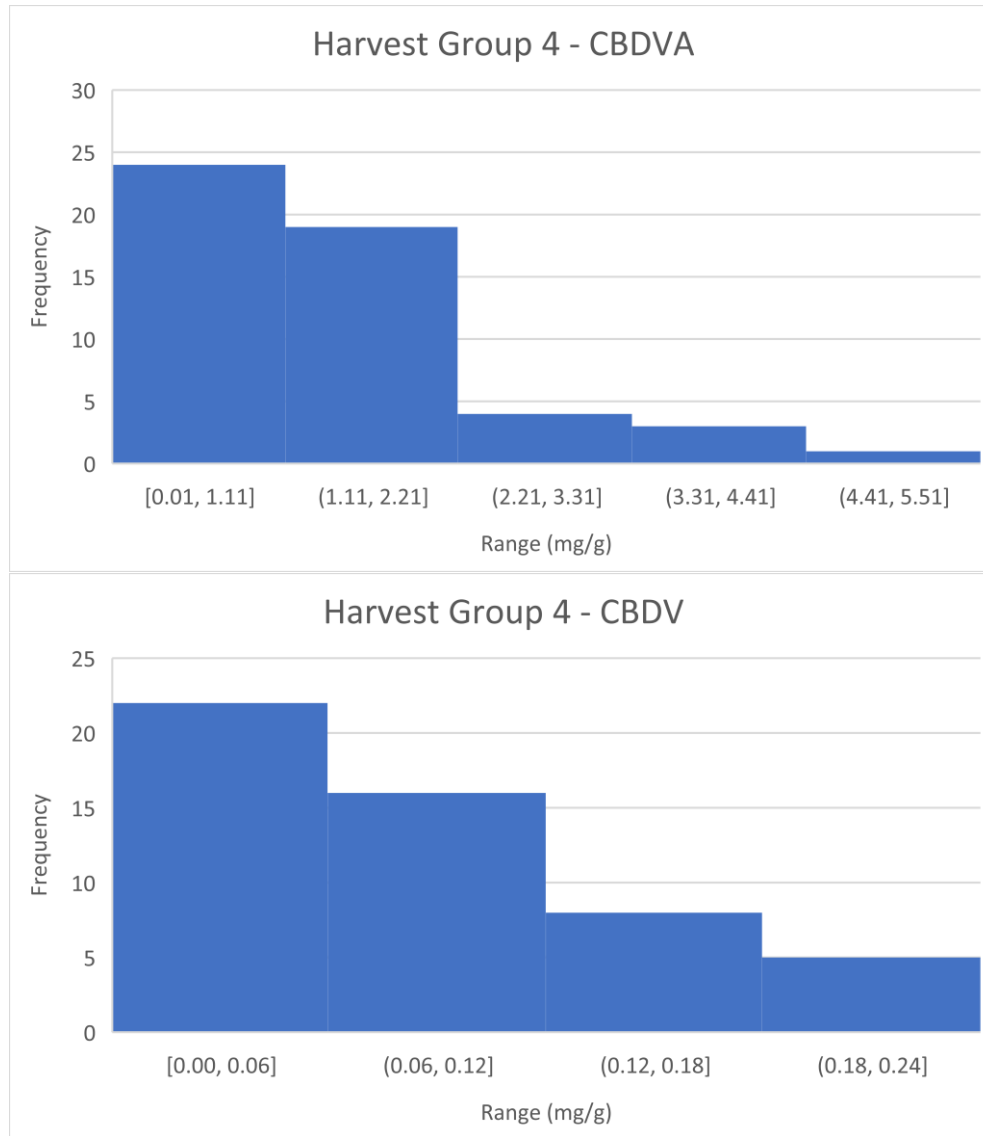

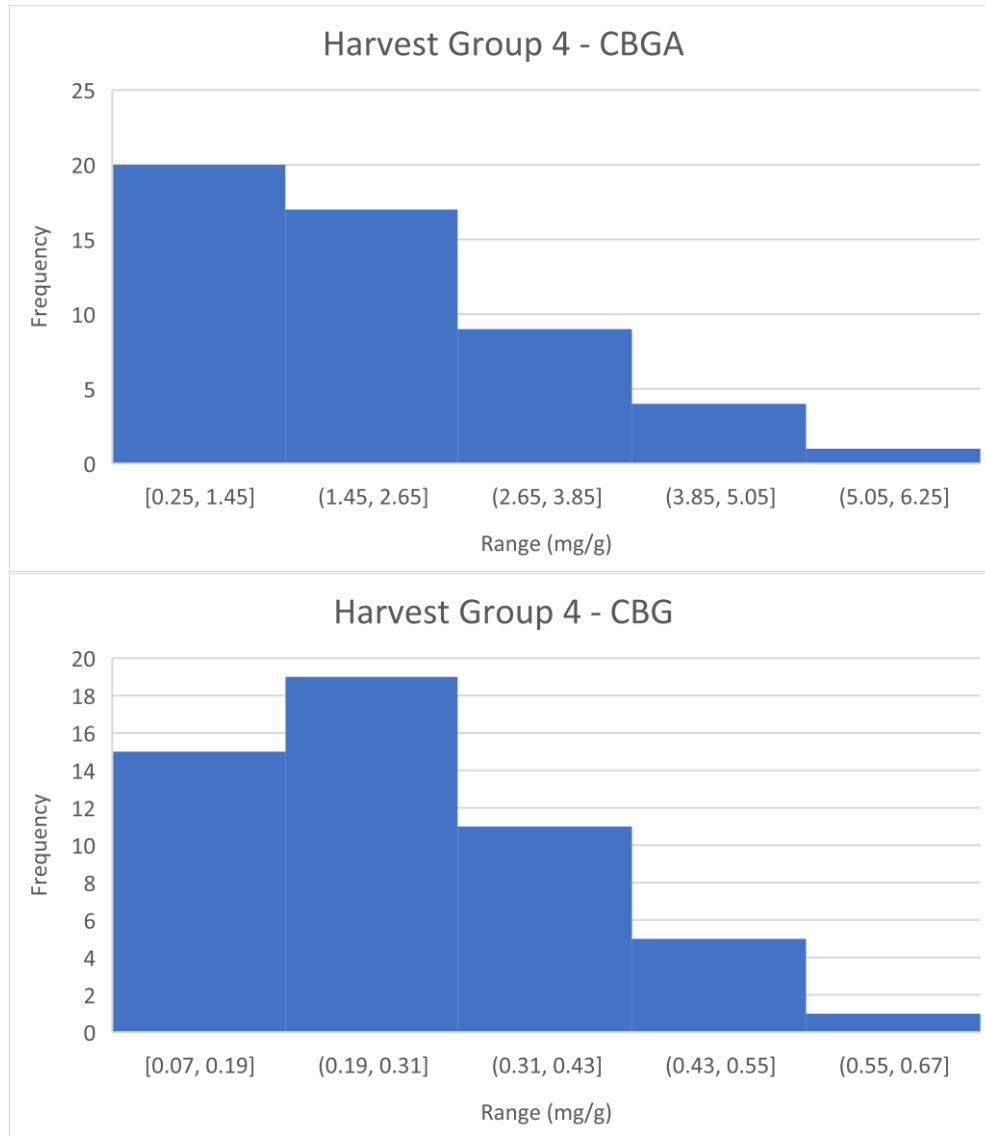

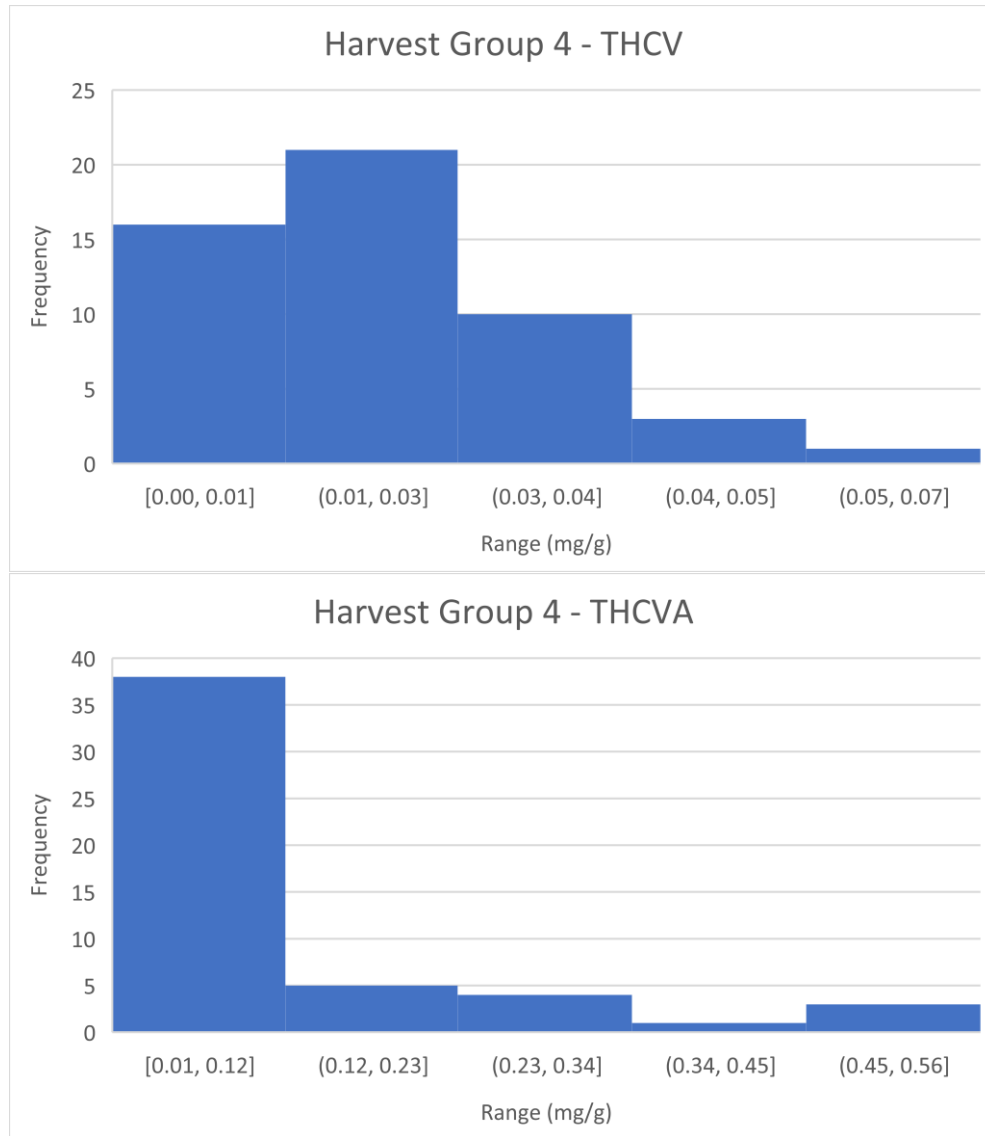

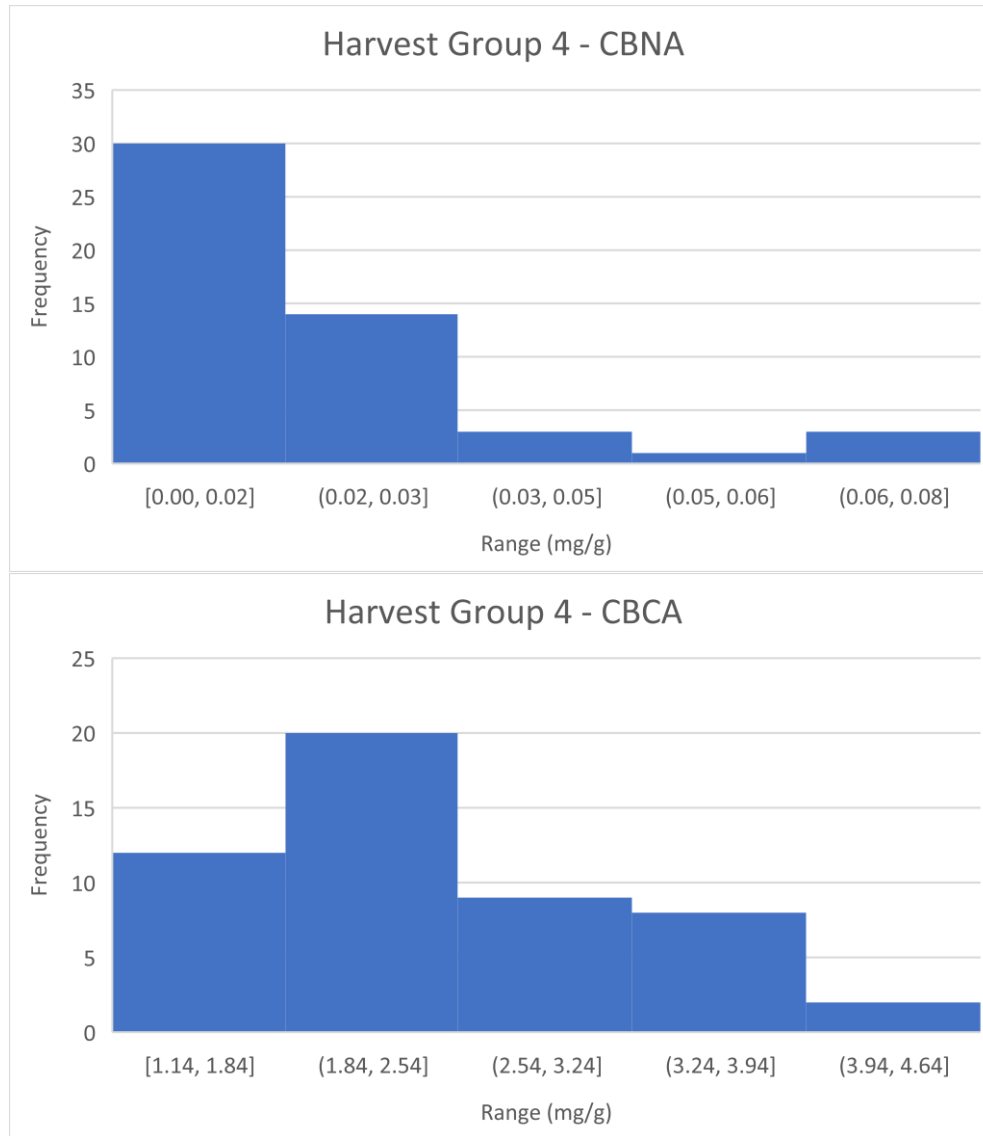

Supplement: s1 [file s1]
