# Supplementary material for: Developing Prediction Models Using Near-Infrared Spectroscopy to Quantify Cannabinoid Content in Cannabis Sativa
Source: MDPI journal article supplement (doi:10.3390/s23052607), 2023-02-27

## Analysis Report

Generated by vic74qy@WL2YR95M3 on 06-Jan-2023 13:56:54

### Model

Principal Components Analysis Model

Developed 06-Jan-2023 13:51:26.690

Author: vic74qy@WL2YR95M3

X-block: AllHarvestsUnaveragedBrukerNIR22MM.xlsx 2202 by 949

(vic74qy@WL2YR95M3@20221104T154753.53527777 m:20221104154754.067)

Included: [ 1-2202 ] [ 1-949 ]

Included (in axis units): [ n/a ] [ 11536-3952 ]

Preprocessing: Detrend, SNV, 2nd Derivative (order: 2, window: 5 pt, tails: weighted), Mean Center

Num. PCs: 5

Algorithm: SVD

Cross validation: venetian blinds w/ 10 splits and blind thickness = 1

RMSEC: 0.000672104

RMSECV: 0.000725013

### SSQ Table

Percent Variance Captured by PCA Model

| Principal<br>Component<br>Number | Eigenvalue<br>of<br>Cov(X) | % Variance<br>Captured<br>This PC | % Variance<br>Captured<br>Total |
|----------------------------------|----------------------------|-----------------------------------|---------------------------------|
| 1                                | 6.20e-04                   | 47.47                             | 47.47                           |
| 2                                | 1.11e-04                   | 8.50                              | 55.97                           |
| 3                                | 7.16e-05                   | 5.48                              | 61.45                           |
| 4                                | 5.28e-05                   | 4.04                              | 65.48                           |
| 5                                | 2.20e-05                   | 1.69                              | 67.17                           |

Figure S2: Score plot of two principal components of the entire cannabis sample set (unaveraged data,  $n = 2202$ ) using the Bruker MPA II FT-NIR spectrometer ( $9000\text{ cm}^{-1}$  to  $4000\text{ cm}^{-1}$  range).

Figures associated with the analysis:

Samples/Scores - PCA 5 PCs - AllHarvestsUnaveragedBrukerNIR22MM.xlsx

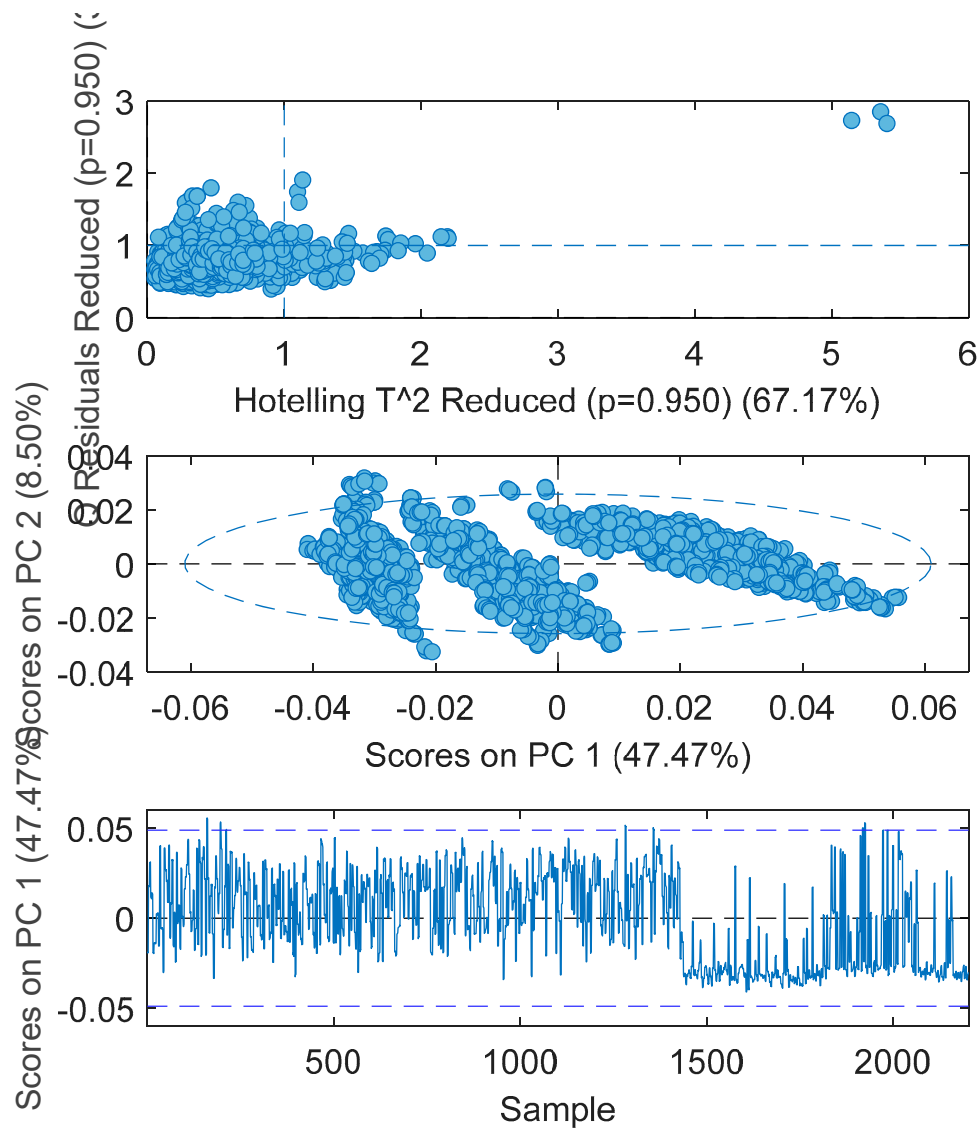

Samples/Scores - PCA 5 PCs - AllHarvestsUnaveragedBrukerNIR22MM.xlsx

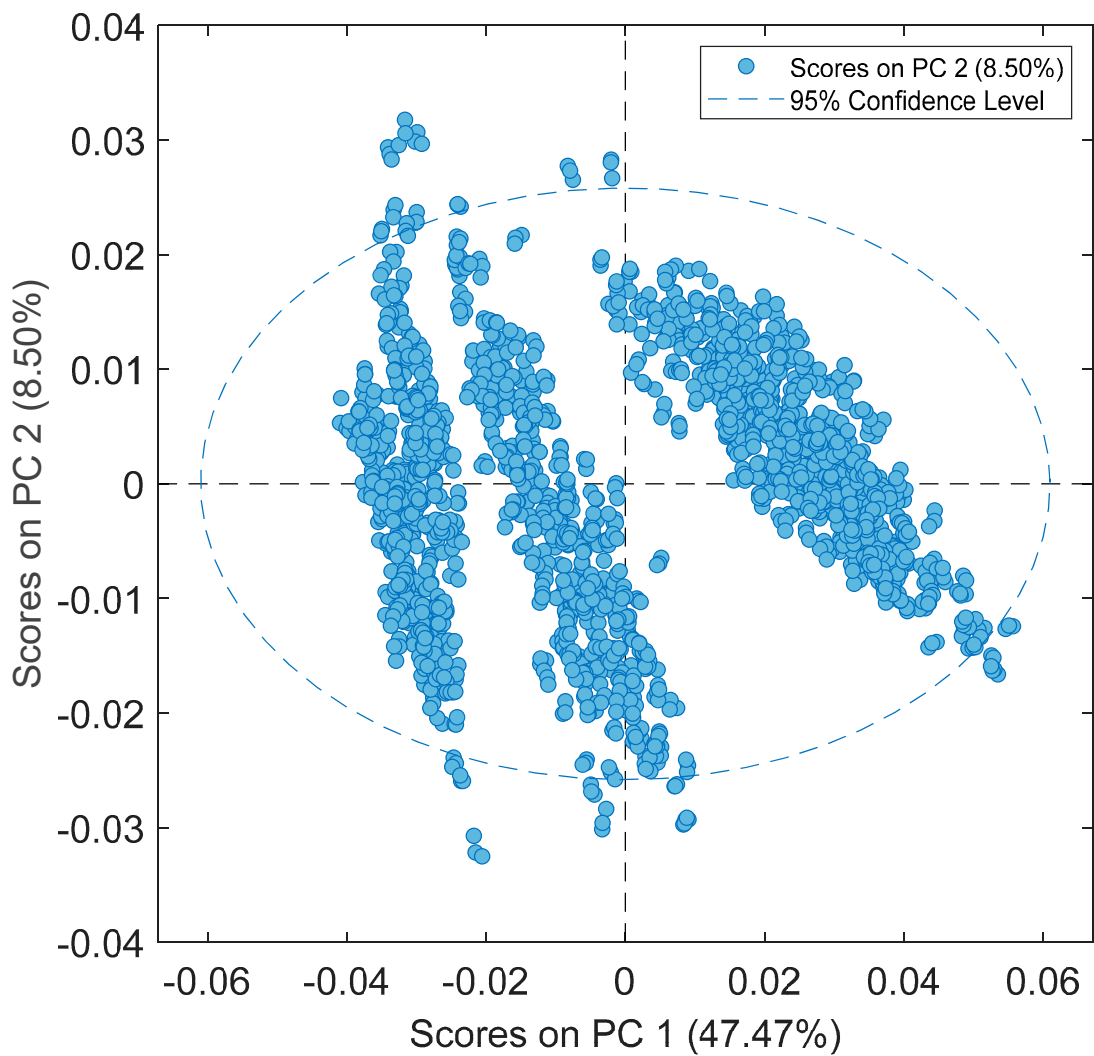

Model Statistics - PCA 5 PCs - AllHarvestsUnaveragedBrukerNIR22MM.xlsx

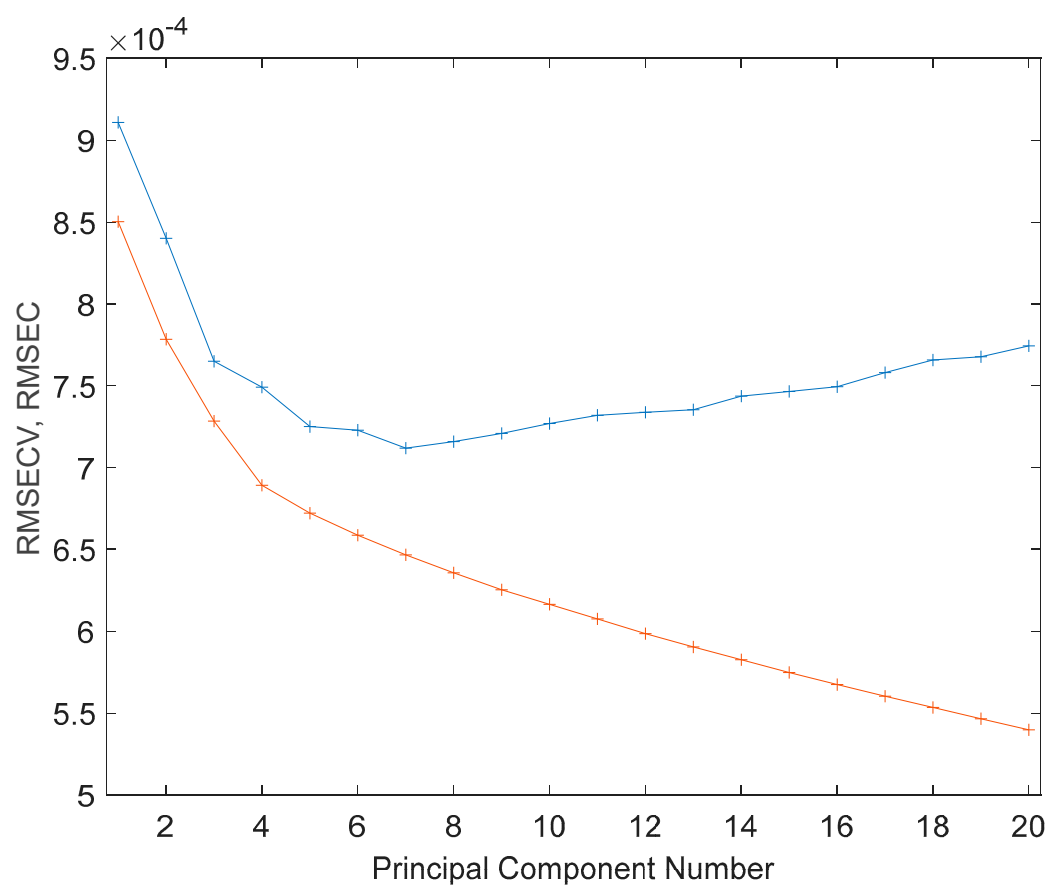

Variables/Loadings - PCA 5 PCs - AllHarvestsUnaveragedBrukerNIR22MM.xlsx

OFFICIAL

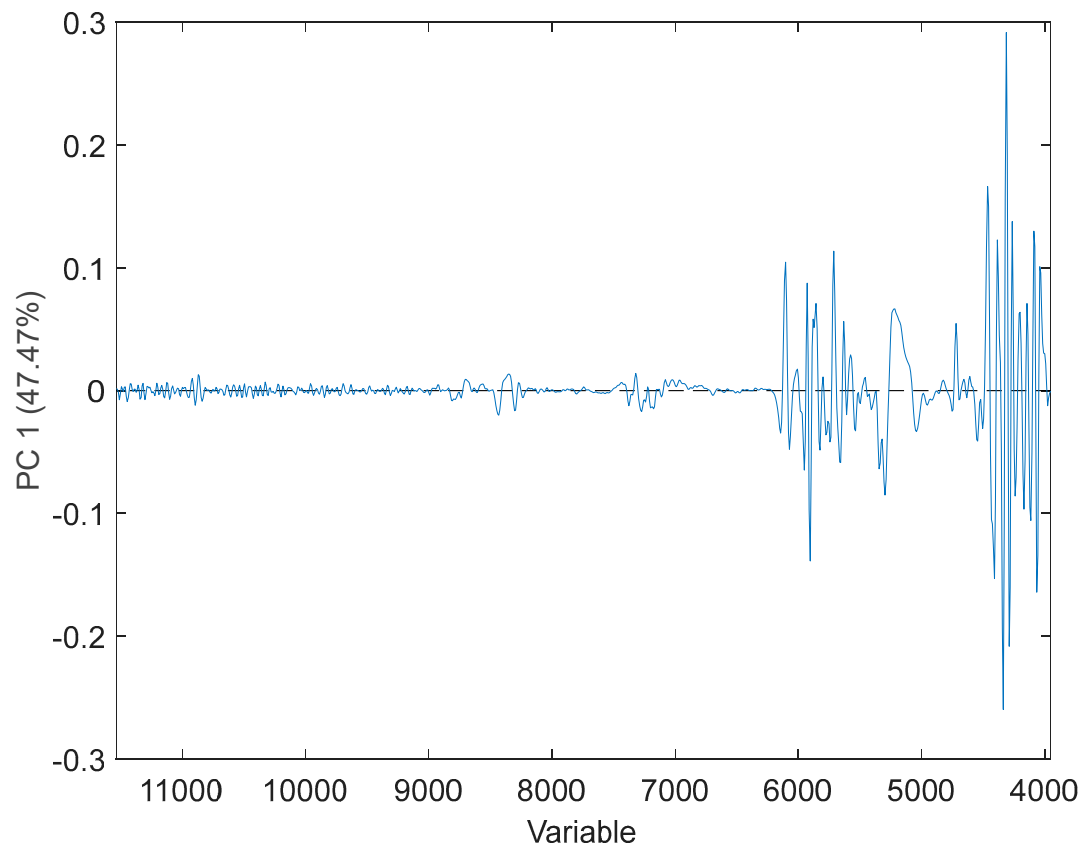

Biplot - PCA 5 PCs - AllHarvestsUnaveragedBrukerNIR22MM.xlsx

OFFICIAL

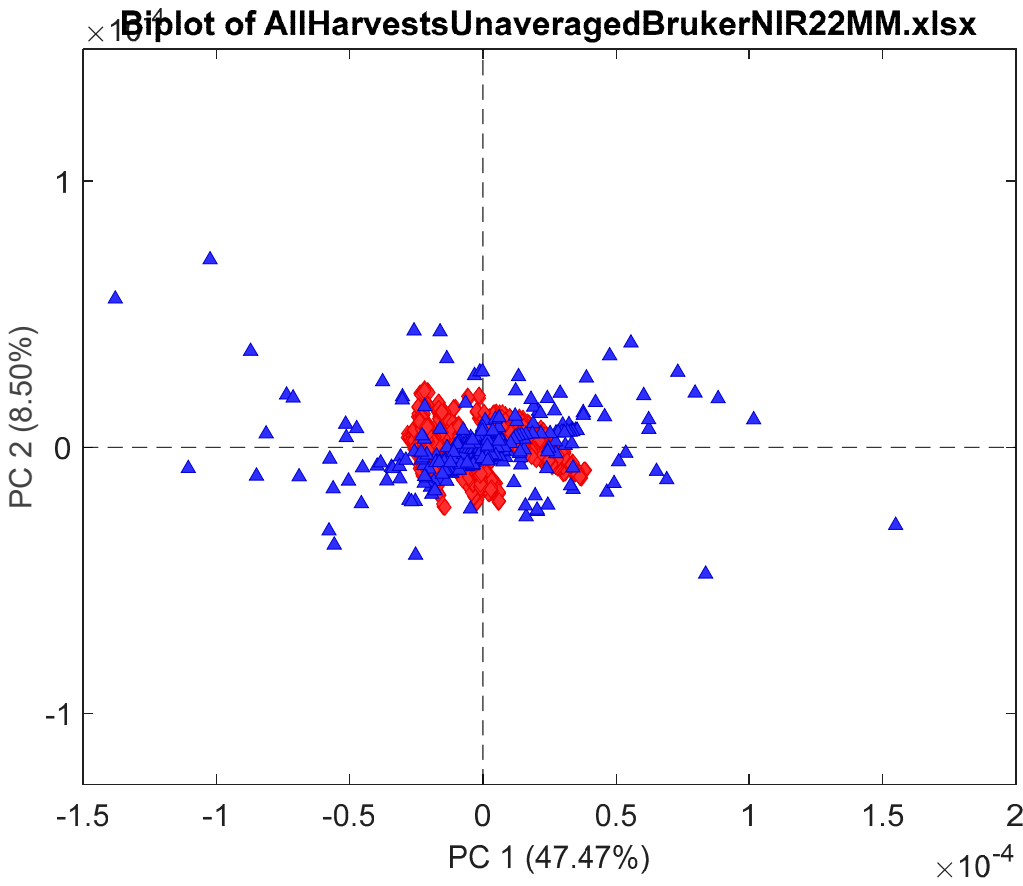

Supplement: s1 [file s1]
