# Supplementary material for: Developing Prediction Models Using Near-Infrared Spectroscopy to Quantify Cannabinoid Content in Cannabis Sativa
Source: MDPI journal article supplement (doi:10.3390/s23052607), 2023-02-27
Supplement: s1 [file s1]

Table S5: Standard error laboratory values of cannabinoid dataset.

Table S5.1 Standard Error Laboratory (SEL) of cannabinoids according to reference LCMS data of all harvest groups. (n = 734)

| Cannabinoid   | SEL (mg/g) |
|---------------|------------|
| <b>CBDA</b>   | 1.24       |
| <b>CBD</b>    | 0.96       |
| <b>CBN</b>    | 0.08       |
| <b>THC</b>    | 0.79       |
| <b>CBC</b>    | 0.08       |
| <b>THCA-A</b> | 4.45       |
| <b>CBDVA</b>  | 0.07       |
| <b>CBDV</b>   | 0.11       |
| <b>CBGA</b>   | 0.79       |
| <b>CBG</b>    | 0.17       |
| <b>THCV</b>   | 0.06       |
| <b>THCVA</b>  | 0.56       |
| <b>CBNA</b>   | 0.13       |
| <b>CBCA</b>   | 0.61       |

Table S5.2 Standard Error Laboratory (SEL) of cannabinoids according to reference LCMS data of harvest group 1. (n = 479)

| Cannabinoid   | SEL (mg/g) |
|---------------|------------|
| <b>CBDA</b>   | 2.21       |
| <b>CBD</b>    | 0.32       |
| <b>CBN</b>    | 0.05       |
| <b>THC</b>    | 0.84       |
| <b>CBC</b>    | 0.06       |
| <b>THCA-A</b> | 3.68       |
| <b>CBDVA</b>  | 0.07       |
| <b>CBDV</b>   | 0.04       |
| <b>CBGA</b>   | 0.36       |
| <b>CBG</b>    | 0.08       |
| <b>THCV</b>   | 0.01       |
| <b>THCVA</b>  | 0.16       |
| <b>CBNA</b>   | 0.12       |
| <b>CBCA</b>   | 0.38       |

Table S5.3 Standard Error Laboratory versus the Standard Error Prediction for CBDA in the high (n = 406) and low (n = 328) ranges.

| <b>Bruker</b>   | <b>SEL<br/>(mg/g)</b> | <b>SEP<br/>(mg/g)</b> | <b>SEP/SEL</b> | <b>R<sup>2</sup></b> | <b>Mean Cannabinoid Concentration<br/>from LCMS data (mg/g)</b> |
|-----------------|-----------------------|-----------------------|----------------|----------------------|-----------------------------------------------------------------|
| CBDA High range | 1.56                  | 4.86                  | <b>3.11</b>    | 0.91                 | 63.80                                                           |
| CBDA Low range  | 0.36                  | 0.66                  | <b>1.82</b>    | 0.25                 | 0.49                                                            |
| <b>MicroNIR</b> |                       |                       |                |                      |                                                                 |
| CBDA High range | 1.56                  | 5.15                  | <b>3.30</b>    | 0.89                 | 63.80                                                           |
| CBDA Low range  | 0.36                  | 0.55                  | <b>1.50</b>    | 0.21                 | 0.49                                                            |

Low range: 0 – 8 mg/g; High range: 8 – 90 mg/g
