# Supplementary material for: Developing Prediction Models Using Near-Infrared Spectroscopy to Quantify Cannabinoid Content in Cannabis Sativa
Source: MDPI journal article supplement (doi:10.3390/s23052607), 2023-02-27
Supplement: s1 [file s1]

Table S4: Definitions of even ratio, high CBDA and high THCA in relation to the CBDA and THCA ratio using LCMS quantitation data (n = 730) for MicroNIR.

| List ID | CBDA<br>(mg/g) | THCA<br>(mg/g) | CBDA/THCA | Classification |
|---------|----------------|----------------|-----------|----------------|
| 1       | 35.84          | 14.15          | 2.53265   | Even Ratio     |
| 2       | 0.29           | 73.53          | 0.00394   | High THCA      |
| 3       | 0.39           | 102.92         | 0.00379   | High THCA      |
| 4       | 0.24           | 72.84          | 0.00330   | High THCA      |
| 5       | 0.33           | 91.69          | 0.00360   | High THCA      |
| 6       | 42.58          | 15.54          | 2.74067   | Even Ratio     |
| 7       | 56.02          | 20.06          | 2.79306   | Even Ratio     |
| 8       | 54.79          | 20.07          | 2.73027   | Even Ratio     |
| 9       | 0.22           | 45.71          | 0.00481   | High THCA      |
| 10      | 77.99          | 39.11          | 1.99432   | Even Ratio     |
| 11      | 47.99          | 18.49          | 2.59506   | Even Ratio     |
| 12      | 0.54           | 116.61         | 0.00463   | High THCA      |
| 13      | 59.95          | 23.41          | 2.56115   | Even Ratio     |
| 14      | 61.23          | 28.44          | 2.15267   | Even Ratio     |
| 15      | 26.41          | 1.24           | 21.22642  | High CBDA      |
| 16      | 0.37           | 122.06         | 0.00303   | High THCA      |
| 17      | 0.42           | 112.48         | 0.00373   | High THCA      |
| 18      | 0.33           | 95.84          | 0.00344   | High THCA      |
| 19      | 0.29           | 64.63          | 0.00449   | High THCA      |
| 20      | 0.34           | 116.88         | 0.00291   | High THCA      |
| 21      | 44.9           | 30.51          | 1.47166   | Even Ratio     |
| 22      | 0.22           | 62.77          | 0.00350   | High THCA      |
| 23      | 0.31           | 108.46         | 0.00286   | High THCA      |
| 24      | 32.77          | 16.61          | 1.97250   | Even Ratio     |
| 25      | 0.21           | 50.36          | 0.00417   | High THCA      |
| 26      | 29.32          | 10.27          | 2.85508   | Even Ratio     |
| 27      | 0.39           | 121.87         | 0.00320   | High THCA      |
| 28      | 60.46          | 34.02          | 1.77744   | Even Ratio     |
| 29      | 104.14         | 48.73          | 2.13709   | Even Ratio     |
| 30      | 44.01          | 12.04          | 3.65577   | Even Ratio     |
| 31      | 0.3            | 102.47         | 0.00293   | High THCA      |
| 32      | 59.79          | 34.61          | 1.72735   | Even Ratio     |
| 33      | 65.37          | 28.20          | 2.31836   | Even Ratio     |
| 34      | 0.29           | 80.66          | 0.00360   | High THCA      |
| 35      | 0.32           | 85.05          | 0.00376   | High THCA      |
| 36      | 0.29           | 99.59          | 0.00291   | High THCA      |
| 37      | 0.44           | 122.39         | 0.00360   | High THCA      |

## OFFICIAL

|    |       |        |          |            |
|----|-------|--------|----------|------------|
| 38 | 0.36  | 91.01  | 0.00396  | High THCA  |
| 39 | 78.49 | 42.23  | 1.85873  | Even Ratio |
| 40 | 64.51 | 25.30  | 2.54991  | Even Ratio |
| 41 | 70.01 | 36.71  | 1.90717  | Even Ratio |
| 42 | 0.27  | 79.78  | 0.00338  | High THCA  |
| 43 | 35.64 | 16.55  | 2.15383  | Even Ratio |
| 44 | 75.09 | 30.89  | 2.43082  | Even Ratio |
| 45 | 0.34  | 104.35 | 0.00326  | High THCA  |
| 46 | 53    | 25.52  | 2.07701  | Even Ratio |
| 47 | 0.41  | 138.30 | 0.00296  | High THCA  |
| 48 | 0.34  | 99.32  | 0.00342  | High THCA  |
| 49 | 45.82 | 17.65  | 2.59574  | Even Ratio |
| 50 | 0.29  | 104.90 | 0.00276  | High THCA  |
| 51 | 0.35  | 131.31 | 0.00267  | High THCA  |
| 52 | 0.35  | 88.88  | 0.00394  | High THCA  |
| 53 | 43.57 | 11.54  | 3.77416  | Even Ratio |
| 54 | 0.46  | 170.33 | 0.00270  | High THCA  |
| 55 | 0.34  | 115.10 | 0.00295  | High THCA  |
| 56 | 60.95 | 23.72  | 2.56929  | Even Ratio |
| 57 | 0.31  | 63.68  | 0.00487  | High THCA  |
| 58 | 0.25  | 104.92 | 0.00238  | High THCA  |
| 59 | 57.71 | 21.33  | 2.70580  | Even Ratio |
| 60 | 23.98 | 1.12   | 21.48768 | High CBDA  |
| 61 | 0.27  | 93.09  | 0.00290  | High THCA  |
| 62 | 0.32  | 104.60 | 0.00306  | High THCA  |
| 63 | 0.28  | 57.54  | 0.00487  | High THCA  |
| 64 | 0.23  | 63.65  | 0.00361  | High THCA  |
| 65 | 0.28  | 95.56  | 0.00293  | High THCA  |
| 66 | 0.37  | 129.70 | 0.00285  | High THCA  |
| 67 | 57.25 | 15.80  | 3.62250  | Even Ratio |
| 68 | 65.8  | 24.99  | 2.63302  | Even Ratio |
| 69 | 0.35  | 82.19  | 0.00426  | High THCA  |
| 70 | 0.4   | 143.39 | 0.00279  | High THCA  |
| 71 | 47.8  | 25.75  | 1.85613  | Even Ratio |
| 72 | 0.3   | 102.91 | 0.00292  | High THCA  |
| 73 | 50.71 | 15.34  | 3.30674  | Even Ratio |
| 74 | 0.35  | 109.02 | 0.00321  | High THCA  |
| 75 | 0.35  | 120.99 | 0.00289  | High THCA  |
| 76 | 74.26 | 28.32  | 2.62205  | Even Ratio |
| 77 | 0.21  | 65.50  | 0.00321  | High THCA  |
| 78 | 0.3   | 73.25  | 0.00410  | High THCA  |
| 79 | 0.35  | 112.87 | 0.00310  | High THCA  |
| 80 | 0.24  | 73.56  | 0.00326  | High THCA  |
| 81 | 0.29  | 89.78  | 0.00323  | High THCA  |
| 82 | 0.3   | 101.69 | 0.00295  | High THCA  |
| 83 | 0.3   | 83.00  | 0.00361  | High THCA  |

## OFFICIAL

## OFFICIAL

|     |       |        |         |            |
|-----|-------|--------|---------|------------|
| 84  | 61.42 | 24.33  | 2.52484 | Even Ratio |
| 85  | 27.44 | 12.62  | 2.17428 | Even Ratio |
| 86  | 0.4   | 123.99 | 0.00323 | High THCA  |
| 87  | 0.34  | 86.26  | 0.00394 | High THCA  |
| 88  | 0.27  | 83.37  | 0.00324 | High THCA  |
| 89  | 37    | 16.12  | 2.29527 | Even Ratio |
| 90  | 0.34  | 112.97 | 0.00301 | High THCA  |
| 91  | 0.29  | 76.69  | 0.00378 | High THCA  |
| 92  | 66.55 | 22.46  | 2.96303 | Even Ratio |
| 93  | 46.07 | 16.66  | 2.76585 | Even Ratio |
| 94  | 46.52 | 18.23  | 2.55128 | Even Ratio |
| 95  | 0.33  | 98.22  | 0.00336 | High THCA  |
| 96  | 0.32  | 91.88  | 0.00348 | High THCA  |
| 97  | 0.33  | 79.09  | 0.00417 | High THCA  |
| 98  | 68.09 | 29.69  | 2.29301 | Even Ratio |
| 99  | 0.25  | 48.09  | 0.00520 | High THCA  |
| 100 | 0.27  | 62.97  | 0.00429 | High THCA  |
| 101 | 65.39 | 24.44  | 2.67563 | Even Ratio |
| 102 | 38.71 | 22.72  | 1.70373 | Even Ratio |
| 103 | 0.33  | 104.28 | 0.00316 | High THCA  |
| 104 | 45.89 | 12.07  | 3.80297 | Even Ratio |
| 105 | 0.37  | 112.73 | 0.00328 | High THCA  |
| 106 | 0.32  | 91.91  | 0.00348 | High THCA  |
| 107 | 0.29  | 53.92  | 0.00538 | High THCA  |
| 108 | 0.28  | 67.14  | 0.00417 | High THCA  |
| 109 | 50.72 | 20.10  | 2.52373 | Even Ratio |
| 110 | 52.13 | 25.85  | 2.01653 | Even Ratio |
| 111 | 0.38  | 103.12 | 0.00369 | High THCA  |
| 112 | 29.78 | 13.18  | 2.26030 | Even Ratio |
| 113 | 0.61  | 84.76  | 0.00720 | High THCA  |
| 114 | 0.31  | 63.85  | 0.00486 | High THCA  |
| 115 | 71.69 | 31.17  | 2.30008 | Even Ratio |
| 116 | 0.27  | 70.22  | 0.00385 | High THCA  |
| 117 | 80.9  | 46.04  | 1.75730 | Even Ratio |
| 118 | 0.39  | 94.79  | 0.00411 | High THCA  |
| 119 | 59.27 | 24.71  | 2.39831 | Even Ratio |
| 120 | 85.89 | 36.70  | 2.34020 | Even Ratio |
| 121 | 0.28  | 97.62  | 0.00287 | High THCA  |
| 122 | 60.11 | 22.52  | 2.66892 | Even Ratio |
| 123 | 65.98 | 21.15  | 3.12011 | Even Ratio |
| 124 | 70.02 | 28.43  | 2.46248 | Even Ratio |
| 125 | 64.14 | 21.03  | 3.04925 | Even Ratio |
| 126 | 0.37  | 107.38 | 0.00345 | High THCA  |
| 127 | 59.34 | 21.06  | 2.81714 | Even Ratio |
| 128 | 0.29  | 86.58  | 0.00335 | High THCA  |
| 129 | 0.26  | 71.79  | 0.00362 | High THCA  |

## OFFICIAL

## OFFICIAL

|     |       |        |          |            |
|-----|-------|--------|----------|------------|
| 130 | 39.66 | 12.87  | 3.08109  | Even Ratio |
| 131 | 0.46  | 134.40 | 0.00342  | High THCA  |
| 132 | 34.2  | 1.27   | 26.90876 | High CBDA  |
| 133 | 51.88 | 34.44  | 1.50643  | Even Ratio |
| 134 | 63.67 | 30.13  | 2.11330  | Even Ratio |
| 135 | 0.3   | 61.65  | 0.00487  | High THCA  |
| 136 | 54.62 | 21.56  | 2.53300  | Even Ratio |
| 137 | 41.41 | 10.48  | 3.94972  | Even Ratio |
| 138 | 0.31  | 114.98 | 0.00270  | High THCA  |
| 139 | 0.31  | 90.24  | 0.00344  | High THCA  |
| 140 | 0.32  | 127.80 | 0.00250  | High THCA  |
| 141 | 0.33  | 93.17  | 0.00354  | High THCA  |
| 142 | 0.27  | 69.41  | 0.00389  | High THCA  |
| 143 | 76    | 32.81  | 2.31627  | Even Ratio |
| 144 | 89.95 | 43.00  | 2.09177  | Even Ratio |
| 145 | 0.24  | 78.91  | 0.00304  | High THCA  |
| 146 | 60.99 | 24.08  | 2.53305  | Even Ratio |
| 147 | 43.8  | 13.17  | 3.32566  | Even Ratio |
| 148 | 0.52  | 73.77  | 0.00705  | High THCA  |
| 149 | 40.17 | 19.82  | 2.02642  | Even Ratio |
| 150 | 0.65  | 117.26 | 0.00554  | High THCA  |
| 151 | 0.27  | 89.13  | 0.00303  | High THCA  |
| 152 | 49    | 18.63  | 2.63008  | Even Ratio |
| 153 | 0.33  | 123.60 | 0.00267  | High THCA  |
| 154 | 0.38  | 128.09 | 0.00297  | High THCA  |
| 155 | 0.34  | 91.25  | 0.00373  | High THCA  |
| 156 | 84.82 | 43.39  | 1.95472  | Even Ratio |
| 157 | 71.94 | 30.25  | 2.37840  | Even Ratio |
| 158 | 0.36  | 100.77 | 0.00357  | High THCA  |
| 159 | 59.16 | 22.74  | 2.60159  | Even Ratio |
| 160 | 40.84 | 20.47  | 1.99544  | Even Ratio |
| 161 | 0.43  | 97.82  | 0.00440  | High THCA  |
| 162 | 0.31  | 86.34  | 0.00359  | High THCA  |
| 163 | 0.42  | 121.88 | 0.00345  | High THCA  |
| 164 | 53.64 | 31.53  | 1.70106  | Even Ratio |
| 165 | 0.38  | 99.83  | 0.00381  | High THCA  |
| 166 | 57.55 | 19.15  | 3.00469  | Even Ratio |
| 167 | 0.35  | 81.32  | 0.00430  | High THCA  |
| 168 | 65.97 | 23.90  | 2.76001  | Even Ratio |
| 169 | 0.36  | 72.24  | 0.00498  | High THCA  |
| 170 | 35.19 | 14.96  | 2.35171  | Even Ratio |
| 171 | 0.32  | 54.60  | 0.00586  | High THCA  |
| 172 | 71.18 | 31.67  | 2.24741  | Even Ratio |
| 173 | 56.71 | 20.59  | 2.75361  | Even Ratio |
| 174 | 0.31  | 67.90  | 0.00457  | High THCA  |
| 175 | 0.35  | 74.23  | 0.00472  | High THCA  |

## OFFICIAL

## OFFICIAL

|     |       |        |          |            |
|-----|-------|--------|----------|------------|
| 176 | 0.34  | 99.53  | 0.00342  | High THCA  |
| 177 | 71.47 | 46.99  | 1.52084  | Even Ratio |
| 178 | 43.44 | 20.50  | 2.11861  | Even Ratio |
| 179 | 0.53  | 98.10  | 0.00540  | High THCA  |
| 180 | 69.33 | 24.04  | 2.88352  | Even Ratio |
| 181 | 0.35  | 107.55 | 0.00325  | High THCA  |
| 182 | 0.3   | 75.59  | 0.00397  | High THCA  |
| 183 | 62.44 | 22.52  | 2.77247  | Even Ratio |
| 184 | 44.41 | 14.37  | 3.09036  | Even Ratio |
| 185 | 0.54  | 93.88  | 0.00575  | High THCA  |
| 186 | 17.48 | 6.08   | 2.87431  | Even Ratio |
| 187 | 0.29  | 83.82  | 0.00346  | High THCA  |
| 188 | 41.71 | 15.02  | 2.77703  | Even Ratio |
| 189 | 0.32  | 97.04  | 0.00330  | High THCA  |
| 190 | 80.48 | 44.23  | 1.81977  | Even Ratio |
| 191 | 0.34  | 110.83 | 0.00307  | High THCA  |
| 192 | 0.28  | 64.25  | 0.00436  | High THCA  |
| 193 | 0.28  | 57.66  | 0.00486  | High THCA  |
| 194 | 0.32  | 89.08  | 0.00359  | High THCA  |
| 195 | 0.26  | 84.07  | 0.00309  | High THCA  |
| 196 | 0.28  | 95.81  | 0.00292  | High THCA  |
| 197 | 70.83 | 32.37  | 2.18843  | Even Ratio |
| 198 | 47.45 | 16.11  | 2.94561  | Even Ratio |
| 199 | 0.32  | 83.56  | 0.00383  | High THCA  |
| 200 | 67.2  | 26.03  | 2.58131  | Even Ratio |
| 201 | 0.42  | 79.72  | 0.00527  | High THCA  |
| 202 | 0.27  | 87.46  | 0.00309  | High THCA  |
| 203 | 0.39  | 125.32 | 0.00311  | High THCA  |
| 204 | 28.18 | 12.70  | 2.21869  | Even Ratio |
| 205 | 9.83  | 0.66   | 14.83663 | High CBDA  |
| 206 | 0.28  | 100.57 | 0.00278  | High THCA  |
| 207 | 0.27  | 76.07  | 0.00355  | High THCA  |
| 208 | 22.53 | 9.97   | 2.25996  | Even Ratio |
| 209 | 0.34  | 118.30 | 0.00287  | High THCA  |
| 210 | 0.33  | 110.49 | 0.00299  | High THCA  |
| 211 | 0.33  | 69.98  | 0.00472  | High THCA  |
| 212 | 0.36  | 88.46  | 0.00407  | High THCA  |
| 213 | 78.59 | 35.65  | 2.20455  | Even Ratio |
| 214 | 0.32  | 97.63  | 0.00328  | High THCA  |
| 215 | 0.31  | 101.53 | 0.00305  | High THCA  |
| 216 | 70.33 | 47.10  | 1.49310  | Even Ratio |
| 217 | 0.34  | 93.50  | 0.00364  | High THCA  |
| 218 | 0.34  | 79.96  | 0.00425  | High THCA  |
| 219 | 37.5  | 17.34  | 2.16308  | Even Ratio |
| 220 | 38.37 | 13.27  | 2.89067  | Even Ratio |
| 221 | 51.67 | 24.59  | 2.10149  | Even Ratio |

## OFFICIAL

## OFFICIAL

|     |       |        |         |            |
|-----|-------|--------|---------|------------|
| 222 | 72.4  | 28.88  | 2.50719 | Even Ratio |
| 223 | 60.98 | 31.24  | 1.95195 | Even Ratio |
| 224 | 0.37  | 110.68 | 0.00334 | High THCA  |
| 225 | 0.4   | 102.64 | 0.00390 | High THCA  |
| 226 | 0.24  | 67.45  | 0.00356 | High THCA  |
| 227 | 60.52 | 25.57  | 2.36722 | Even Ratio |
| 228 | 0.29  | 83.54  | 0.00347 | High THCA  |
| 229 | 0.43  | 97.66  | 0.00440 | High THCA  |
| 230 | 0.3   | 96.96  | 0.00309 | High THCA  |
| 231 | 60.06 | 31.10  | 1.93094 | Even Ratio |
| 232 | 0.29  | 73.89  | 0.00392 | High THCA  |
| 233 | 0.31  | 86.79  | 0.00357 | High THCA  |
| 234 | 0.31  | 102.85 | 0.00301 | High THCA  |
| 235 | 54.22 | 20.74  | 2.61394 | Even Ratio |
| 236 | 0.26  | 80.77  | 0.00322 | High THCA  |
| 237 | 69.96 | 34.72  | 2.01523 | Even Ratio |
| 238 | 63.63 | 26.91  | 2.36446 | Even Ratio |
| 239 | 0.29  | 97.69  | 0.00297 | High THCA  |
| 240 | 54.94 | 22.95  | 2.39375 | Even Ratio |
| 241 | 0.31  | 109.12 | 0.00284 | High THCA  |
| 242 | 0.23  | 70.69  | 0.00325 | High THCA  |
| 243 | 0.23  | 77.18  | 0.00298 | High THCA  |
| 244 | 0.25  | 104.82 | 0.00238 | High THCA  |
| 245 | 0.21  | 73.63  | 0.00285 | High THCA  |
| 246 | 0.23  | 79.30  | 0.00290 | High THCA  |
| 247 | 0.35  | 107.77 | 0.00325 | High THCA  |
| 248 | 0.27  | 59.86  | 0.00451 | High THCA  |
| 249 | 0.24  | 66.15  | 0.00363 | High THCA  |
| 250 | 0.31  | 91.29  | 0.00340 | High THCA  |
| 251 | 29.97 | 13.86  | 2.16260 | Even Ratio |
| 252 | 29.42 | 14.74  | 1.99642 | Even Ratio |
| 253 | 74.36 | 25.60  | 2.90417 | Even Ratio |
| 254 | 0.32  | 75.36  | 0.00425 | High THCA  |
| 255 | 66.39 | 22.77  | 2.91574 | Even Ratio |
| 256 | 0.38  | 122.45 | 0.00310 | High THCA  |
| 257 | 68.68 | 29.08  | 2.36188 | Even Ratio |
| 258 | 51.23 | 16.10  | 3.18282 | Even Ratio |
| 259 | 0.53  | 99.69  | 0.00532 | High THCA  |
| 260 | 42.64 | 15.96  | 2.67125 | Even Ratio |
| 261 | 0.34  | 77.21  | 0.00440 | High THCA  |
| 262 | 47.27 | 11.43  | 4.13604 | Even Ratio |
| 263 | 0.27  | 85.76  | 0.00315 | High THCA  |
| 264 | 0.37  | 95.29  | 0.00388 | High THCA  |
| 265 | 0.33  | 110.03 | 0.00300 | High THCA  |
| 266 | 40.74 | 14.85  | 2.74301 | Even Ratio |
| 267 | 66.62 | 28.68  | 2.32292 | Even Ratio |

## OFFICIAL

## OFFICIAL

|     |       |        |         |            |
|-----|-------|--------|---------|------------|
| 268 | 72.1  | 23.24  | 3.10221 | Even Ratio |
| 269 | 0.4   | 92.83  | 0.00431 | High THCA  |
| 270 | 0.3   | 89.63  | 0.00335 | High THCA  |
| 271 | 62.91 | 32.49  | 1.93637 | Even Ratio |
| 272 | 66.29 | 25.98  | 2.55109 | Even Ratio |
| 273 | 0.34  | 97.11  | 0.00350 | High THCA  |
| 274 | 0.29  | 85.75  | 0.00338 | High THCA  |
| 275 | 0.46  | 87.37  | 0.00526 | High THCA  |
| 276 | 0.22  | 72.30  | 0.00304 | High THCA  |
| 277 | 0.29  | 102.99 | 0.00282 | High THCA  |
| 278 | 0.25  | 85.53  | 0.00292 | High THCA  |
| 279 | 0.34  | 131.32 | 0.00259 | High THCA  |
| 280 | 0.45  | 131.66 | 0.00342 | High THCA  |
| 281 | 0.39  | 108.73 | 0.00359 | High THCA  |
| 282 | 53.95 | 26.66  | 2.02394 | Even Ratio |
| 283 | 0.29  | 104.22 | 0.00278 | High THCA  |
| 284 | 72.64 | 21.60  | 3.36352 | Even Ratio |
| 285 | 50.1  | 23.66  | 2.11708 | Even Ratio |
| 286 | 0.27  | 78.51  | 0.00344 | High THCA  |
| 287 | 0.35  | 94.29  | 0.00371 | High THCA  |
| 288 | 0.26  | 79.57  | 0.00327 | High THCA  |
| 289 | 48.99 | 26.95  | 1.81749 | Even Ratio |
| 290 | 57.63 | 22.73  | 2.53558 | Even Ratio |
| 291 | 0.3   | 52.00  | 0.00577 | High THCA  |
| 292 | 0.33  | 92.86  | 0.00355 | High THCA  |
| 293 | 0.25  | 56.85  | 0.00440 | High THCA  |
| 294 | 48.28 | 19.17  | 2.51890 | Even Ratio |
| 295 | 0.29  | 77.13  | 0.00376 | High THCA  |
| 296 | 0.4   | 114.13 | 0.00350 | High THCA  |
| 297 | 0.28  | 62.52  | 0.00448 | High THCA  |
| 298 | 64.44 | 20.73  | 3.10910 | Even Ratio |
| 299 | 62.79 | 27.71  | 2.26576 | Even Ratio |
| 300 | 76.12 | 34.14  | 2.22948 | Even Ratio |
| 301 | 63.75 | 28.62  | 2.22719 | Even Ratio |
| 302 | 0.35  | 87.38  | 0.00401 | High THCA  |
| 303 | 0.3   | 97.60  | 0.00307 | High THCA  |
| 304 | 0.34  | 100.94 | 0.00337 | High THCA  |
| 305 | 0.33  | 116.64 | 0.00283 | High THCA  |
| 306 | 0.29  | 81.36  | 0.00356 | High THCA  |
| 307 | 0.3   | 88.95  | 0.00337 | High THCA  |
| 308 | 0.23  | 59.07  | 0.00389 | High THCA  |
| 309 | 0.36  | 101.51 | 0.00355 | High THCA  |
| 310 | 53.84 | 18.86  | 2.85411 | Even Ratio |
| 311 | 66.76 | 30.22  | 2.20890 | Even Ratio |
| 312 | 58.91 | 28.15  | 2.09264 | Even Ratio |
| 313 | 0.31  | 122.31 | 0.00253 | High THCA  |

## OFFICIAL

## OFFICIAL

|     |       |        |          |            |
|-----|-------|--------|----------|------------|
| 314 | 0.35  | 125.36 | 0.00279  | High THCA  |
| 315 | 17.14 | 0.82   | 20.94682 | High CBDA  |
| 316 | 43.87 | 17.72  | 2.47613  | Even Ratio |
| 317 | 65.03 | 34.05  | 1.90998  | Even Ratio |
| 318 | 0.31  | 64.20  | 0.00483  | High THCA  |
| 319 | 66.71 | 33.53  | 1.98956  | Even Ratio |
| 320 | 0.3   | 82.11  | 0.00365  | High THCA  |
| 321 | 0.38  | 118.54 | 0.00321  | High THCA  |
| 322 | 0.25  | 80.47  | 0.00311  | High THCA  |
| 323 | 79.39 | 32.69  | 2.42868  | Even Ratio |
| 324 | 0.36  | 73.01  | 0.00493  | High THCA  |
| 325 | 0.34  | 91.94  | 0.00370  | High THCA  |
| 326 | 27.12 | 9.92   | 2.73268  | Even Ratio |
| 327 | 0.31  | 71.17  | 0.00436  | High THCA  |
| 328 | 0.24  | 69.00  | 0.00348  | High THCA  |
| 329 | 74.14 | 21.70  | 3.41643  | Even Ratio |
| 330 | 0.32  | 85.89  | 0.00373  | High THCA  |
| 331 | 66.67 | 27.68  | 2.40836  | Even Ratio |
| 332 | 60.34 | 25.94  | 2.32622  | Even Ratio |
| 333 | 0.28  | 72.26  | 0.00387  | High THCA  |
| 334 | 61.77 | 31.12  | 1.98505  | Even Ratio |
| 335 | 0.26  | 69.28  | 0.00375  | High THCA  |
| 336 | 0.36  | 92.41  | 0.00390  | High THCA  |
| 337 | 0.25  | 78.11  | 0.00320  | High THCA  |
| 338 | 0.28  | 71.67  | 0.00391  | High THCA  |
| 339 | 0.22  | 53.62  | 0.00410  | High THCA  |
| 340 | 13.26 | 6.09   | 2.17695  | Even Ratio |
| 341 | 0.39  | 111.64 | 0.00349  | High THCA  |
| 342 | 65.87 | 24.00  | 2.74474  | Even Ratio |
| 343 | 0.36  | 88.33  | 0.00408  | High THCA  |
| 344 | 0.24  | 65.34  | 0.00367  | High THCA  |
| 345 | 0.22  | 63.24  | 0.00348  | High THCA  |
| 346 | 0.25  | 80.90  | 0.00309  | High THCA  |
| 347 | 0.38  | 118.31 | 0.00321  | High THCA  |
| 348 | 0.33  | 114.33 | 0.00289  | High THCA  |
| 349 | 0.25  | 74.87  | 0.00334  | High THCA  |
| 350 | 0.23  | 68.71  | 0.00335  | High THCA  |
| 351 | 0.27  | 75.32  | 0.00358  | High THCA  |
| 352 | 0.27  | 83.59  | 0.00323  | High THCA  |
| 353 | 29.81 | 12.06  | 2.47119  | Even Ratio |
| 354 | 0.28  | 105.39 | 0.00266  | High THCA  |
| 355 | 0.23  | 69.91  | 0.00329  | High THCA  |
| 356 | 0.29  | 102.84 | 0.00282  | High THCA  |
| 357 | 0.34  | 109.27 | 0.00311  | High THCA  |
| 358 | 0.28  | 102.96 | 0.00272  | High THCA  |
| 359 | 0.32  | 103.87 | 0.00308  | High THCA  |

## OFFICIAL



## OFFICIAL

|     |       |        |         |            |
|-----|-------|--------|---------|------------|
| 360 | 0.29  | 81.96  | 0.00354 | High THCA  |
| 361 | 0.28  | 91.49  | 0.00306 | High THCA  |
| 362 | 49.4  | 14.12  | 3.49810 | Even Ratio |
| 363 | 0.32  | 94.36  | 0.00339 | High THCA  |
| 364 | 0.3   | 61.16  | 0.00491 | High THCA  |
| 365 | 62.18 | 38.65  | 1.60895 | Even Ratio |
| 366 | 14.76 | 6.25   | 2.36205 | Even Ratio |
| 367 | 1.23  | 56.33  | 0.02184 | High THCA  |
| 368 | 0.31  | 99.94  | 0.00310 | High THCA  |
| 369 | 0.29  | 105.75 | 0.00274 | High THCA  |
| 370 | 0.35  | 125.68 | 0.00278 | High THCA  |
| 371 | 0.27  | 83.39  | 0.00324 | High THCA  |
| 372 | 0.27  | 85.08  | 0.00317 | High THCA  |
| 373 | 0.35  | 148.84 | 0.00235 | High THCA  |
| 374 | 0.36  | 112.20 | 0.00321 | High THCA  |
| 375 | 0.28  | 106.31 | 0.00263 | High THCA  |
| 376 | 60.5  | 32.84  | 1.84240 | Even Ratio |
| 377 | 0.31  | 99.37  | 0.00312 | High THCA  |
| 378 | 83.37 | 40.04  | 2.08233 | Even Ratio |
| 379 | 0.38  | 136.29 | 0.00279 | High THCA  |
| 380 | 0.36  | 114.91 | 0.00313 | High THCA  |
| 381 | 62.43 | 30.96  | 2.01617 | Even Ratio |
| 382 | 0.33  | 95.89  | 0.00344 | High THCA  |
| 383 | 0.3   | 100.10 | 0.00300 | High THCA  |
| 384 | 44.71 | 31.39  | 1.42416 | Even Ratio |
| 385 | 0.33  | 99.25  | 0.00332 | High THCA  |
| 386 | 38.49 | 14.19  | 2.71190 | Even Ratio |
| 387 | 0.33  | 130.84 | 0.00252 | High THCA  |
| 388 | 75.01 | 24.58  | 3.05183 | Even Ratio |
| 389 | 19.83 | 9.97   | 1.98849 | Even Ratio |
| 390 | 0.33  | 81.97  | 0.00403 | High THCA  |
| 391 | 0.23  | 43.98  | 0.00523 | High THCA  |
| 392 | 0.25  | 81.23  | 0.00308 | High THCA  |
| 393 | 29.07 | 12.04  | 2.41486 | Even Ratio |
| 394 | 0.23  | 73.92  | 0.00311 | High THCA  |
| 395 | 0.33  | 88.30  | 0.00374 | High THCA  |
| 396 | 0.29  | 89.31  | 0.00325 | High THCA  |
| 397 | 0.21  | 68.89  | 0.00305 | High THCA  |
| 398 | 0.28  | 95.33  | 0.00294 | High THCA  |
| 399 | 0.33  | 103.13 | 0.00320 | High THCA  |
| 400 | 0.27  | 84.58  | 0.00319 | High THCA  |
| 401 | 0.32  | 118.53 | 0.00270 | High THCA  |
| 402 | 66.59 | 23.57  | 2.82517 | Even Ratio |
| 403 | 67.4  | 18.40  | 3.66338 | Even Ratio |
| 404 | 68.11 | 26.48  | 2.57243 | Even Ratio |
| 405 | 0.42  | 92.22  | 0.00455 | High THCA  |

## OFFICIAL

## OFFICIAL

|     |       |        |         |            |
|-----|-------|--------|---------|------------|
| 406 | 73.01 | 22.18  | 3.29115 | Even Ratio |
| 407 | 76.43 | 35.16  | 2.17355 | Even Ratio |
| 408 | 0.4   | 85.32  | 0.00469 | High THCA  |
| 409 | 0.31  | 75.91  | 0.00408 | High THCA  |
| 410 | 40.88 | 20.43  | 2.00145 | Even Ratio |
| 411 | 54.85 | 15.37  | 3.56802 | Even Ratio |
| 412 | 0.5   | 87.77  | 0.00570 | High THCA  |
| 413 | 47.31 | 16.49  | 2.86951 | Even Ratio |
| 414 | 0.28  | 69.90  | 0.00401 | High THCA  |
| 415 | 0.3   | 108.82 | 0.00276 | High THCA  |
| 416 | 0.45  | 117.71 | 0.00382 | High THCA  |
| 417 | 0.27  | 88.67  | 0.00304 | High THCA  |
| 418 | 59.97 | 20.53  | 2.92160 | Even Ratio |
| 419 | 92.26 | 46.57  | 1.98117 | Even Ratio |
| 420 | 0.23  | 60.99  | 0.00377 | High THCA  |
| 421 | 0.33  | 40.90  | 0.00807 | High THCA  |
| 422 | 44.42 | 16.83  | 2.63899 | Even Ratio |
| 423 | 42.91 | 13.37  | 3.20867 | Even Ratio |
| 424 | 0.59  | 150.49 | 0.00392 | High THCA  |
| 425 | 55.98 | 41.38  | 1.35280 | Even Ratio |
| 426 | 0.3   | 91.64  | 0.00327 | High THCA  |
| 427 | 41.38 | 16.88  | 2.45179 | Even Ratio |
| 428 | 0.24  | 46.78  | 0.00513 | High THCA  |
| 429 | 0.33  | 117.53 | 0.00281 | High THCA  |
| 430 | 0.3   | 92.26  | 0.00325 | High THCA  |
| 431 | 0.24  | 62.65  | 0.00383 | High THCA  |
| 432 | 61.56 | 23.75  | 2.59244 | Even Ratio |
| 433 | 36.45 | 16.44  | 2.21755 | Even Ratio |
| 434 | 0.31  | 102.36 | 0.00303 | High THCA  |
| 435 | 59.41 | 19.33  | 3.07278 | Even Ratio |
| 436 | 0.27  | 48.31  | 0.00559 | High THCA  |
| 437 | 0.33  | 121.46 | 0.00272 | High THCA  |
| 438 | 0.27  | 90.62  | 0.00298 | High THCA  |
| 439 | 50.69 | 15.43  | 3.28552 | Even Ratio |
| 440 | 0.3   | 87.87  | 0.00341 | High THCA  |
| 441 | 0.28  | 101.22 | 0.00277 | High THCA  |
| 442 | 0.31  | 111.40 | 0.00278 | High THCA  |
| 443 | 0.28  | 81.68  | 0.00343 | High THCA  |
| 444 | 0.31  | 92.13  | 0.00336 | High THCA  |
| 445 | 0.28  | 84.30  | 0.00332 | High THCA  |
| 446 | 0.24  | 82.38  | 0.00291 | High THCA  |
| 447 | 58    | 19.21  | 3.01968 | Even Ratio |
| 448 | 0.28  | 88.28  | 0.00317 | High THCA  |
| 449 | 0.45  | 136.74 | 0.00329 | High THCA  |
| 450 | 62.48 | 23.14  | 2.69989 | Even Ratio |
| 451 | 0.45  | 100.94 | 0.00446 | High THCA  |

## OFFICIAL

## OFFICIAL

|     |        |        |          |            |
|-----|--------|--------|----------|------------|
| 452 | 0.29   | 122.63 | 0.00236  | High THCA  |
| 453 | 0.33   | 134.97 | 0.00245  | High THCA  |
| 454 | 0.4    | 133.06 | 0.00301  | High THCA  |
| 455 | 0.29   | 100.99 | 0.00287  | High THCA  |
| 456 | 0.4    | 141.30 | 0.00283  | High THCA  |
| 457 | 0.26   | 63.01  | 0.00413  | High THCA  |
| 458 | 0.26   | 40.25  | 0.00646  | High THCA  |
| 459 | 0.32   | 82.85  | 0.00386  | High THCA  |
| 460 | 0.28   | 81.98  | 0.00342  | High THCA  |
| 461 | 74.41  | 37.20  | 2.00022  | Even Ratio |
| 462 | 33.62  | 13.43  | 2.50377  | Even Ratio |
| 463 | 0.27   | 80.22  | 0.00337  | High THCA  |
| 464 | 0.22   | 51.86  | 0.00424  | High THCA  |
| 465 | 0.47   | 129.67 | 0.00362  | High THCA  |
| 466 | 0.26   | 77.28  | 0.00336  | High THCA  |
| 467 | 67.64  | 26.67  | 2.53588  | Even Ratio |
| 468 | 0.31   | 93.16  | 0.00333  | High THCA  |
| 469 | 0.26   | 61.71  | 0.00421  | High THCA  |
| 470 | 66.52  | 31.39  | 2.11937  | Even Ratio |
| 471 | 0.33   | 101.96 | 0.00324  | High THCA  |
| 472 | 0.29   | 84.47  | 0.00343  | High THCA  |
| 473 | 29.95  | 8.41   | 3.56084  | Even Ratio |
| 474 | 0.21   | 32.18  | 0.00653  | High THCA  |
| 475 | 62.4   | 29.44  | 2.11966  | Even Ratio |
| 476 | 87.88  | 2.22   | 39.58559 | High CBDA  |
| 477 | 69     | 1.81   | 38.12155 | High CBDA  |
| 478 | 56.06  | 1.69   | 33.17160 | High CBDA  |
| 479 | 69.53  | 1.75   | 39.73143 | High CBDA  |
| 480 | 70.08  | 1.86   | 37.67742 | High CBDA  |
| 481 | 86.38  | 2.39   | 36.14226 | High CBDA  |
| 482 | 58.27  | 1.31   | 44.48092 | High CBDA  |
| 483 | 74.57  | 1.51   | 49.38411 | High CBDA  |
| 484 | 94.61  | 44.64  | 2.11940  | Even Ratio |
| 485 | 87.46  | 2.12   | 41.25472 | High CBDA  |
| 486 | 97.95  | 3.09   | 31.69903 | High CBDA  |
| 487 | 64.72  | 1.9    | 34.06316 | High CBDA  |
| 488 | 71.12  | 1.22   | 58.29508 | High CBDA  |
| 489 | 99.69  | 2.42   | 41.19421 | High CBDA  |
| 490 | 113.97 | 2.52   | 45.22619 | High CBDA  |
| 491 | 77.35  | 41.46  | 1.86565  | Even Ratio |
| 492 | 69.44  | 1.48   | 46.91892 | High CBDA  |
| 493 | 51.71  | 1.43   | 36.16084 | High CBDA  |
| 494 | 81.15  | 1.98   | 40.98485 | High CBDA  |
| 495 | 96.87  | 1.95   | 49.67692 | High CBDA  |
| 496 | 101.91 | 2.58   | 39.50000 | High CBDA  |
| 497 | 67.54  | 1.57   | 43.01911 | High CBDA  |

## OFFICIAL

## OFFICIAL

|     |        |        |          |            |
|-----|--------|--------|----------|------------|
| 498 | 62.34  | 1.51   | 41.28477 | High CBDA  |
| 499 | 86.93  | 1.76   | 49.39205 | High CBDA  |
| 500 | 74.83  | 2.21   | 33.85973 | High CBDA  |
| 501 | 60.73  | 1.12   | 54.22321 | High CBDA  |
| 502 | 97.32  | 2.28   | 42.68421 | High CBDA  |
| 503 | 122.48 | 51.64  | 2.37180  | Even Ratio |
| 504 | 76.39  | 1.33   | 57.43609 | High CBDA  |
| 505 | 75.31  | 1.96   | 38.42347 | High CBDA  |
| 506 | 68.89  | 1.99   | 34.61809 | High CBDA  |
| 507 | 109.6  | 2.75   | 39.85455 | High CBDA  |
| 508 | 52.24  | 1.3    | 40.18462 | High CBDA  |
| 509 | 71.43  | 1.24   | 57.60484 | High CBDA  |
| 510 | 77.84  | 1.87   | 41.62567 | High CBDA  |
| 511 | 75.46  | 1.72   | 43.87209 | High CBDA  |
| 512 | 89.16  | 2.22   | 40.16216 | High CBDA  |
| 513 | 93.84  | 2.43   | 38.61728 | High CBDA  |
| 514 | 80.51  | 1.99   | 40.45729 | High CBDA  |
| 515 | 64.97  | 1.39   | 46.74101 | High CBDA  |
| 516 | 85.39  | 47.9   | 1.78267  | Even Ratio |
| 517 | 58.88  | 1.54   | 38.23377 | High CBDA  |
| 518 | 84.54  | 1.54   | 54.89610 | High CBDA  |
| 519 | 92.81  | 2.64   | 35.15530 | High CBDA  |
| 520 | 101.25 | 2.47   | 40.99190 | High CBDA  |
| 521 | 61.39  | 1.29   | 47.58915 | High CBDA  |
| 522 | 0.72   | 114.56 | 0.00628  | High THCA  |
| 523 | 69.76  | 1.7    | 41.03529 | High CBDA  |
| 524 | 56.26  | 1.26   | 44.65079 | High CBDA  |
| 525 | 73.02  | 1.78   | 41.02247 | High CBDA  |
| 526 | 87.62  | 1.9    | 46.11579 | High CBDA  |
| 527 | 88.42  | 1.9    | 46.53684 | High CBDA  |
| 528 | 83.36  | 1.65   | 50.52121 | High CBDA  |
| 529 | 85.9   | 2.62   | 32.78626 | High CBDA  |
| 530 | 88.76  | 2.48   | 35.79032 | High CBDA  |
| 531 | 92.04  | 2.77   | 33.22744 | High CBDA  |
| 532 | 63.81  | 1.59   | 40.13208 | High CBDA  |
| 533 | 73.19  | 37.4   | 1.95695  | Even Ratio |
| 534 | 58.03  | 1.65   | 35.16970 | High CBDA  |
| 535 | 0.33   | 113.27 | 0.00291  | High THCA  |
| 536 | 89.98  | 2.44   | 36.87705 | High CBDA  |
| 537 | 84.7   | 2.04   | 41.51961 | High CBDA  |
| 538 | 71.04  | 1.43   | 49.67832 | High CBDA  |
| 539 | 63.85  | 1.6    | 39.90625 | High CBDA  |
| 540 | 120.4  | 3.6    | 33.44444 | High CBDA  |
| 541 | 68.78  | 1.36   | 50.57353 | High CBDA  |
| 542 | 50.98  | 0.93   | 54.81720 | High CBDA  |
| 543 | 102.54 | 42.39  | 2.41897  | Even Ratio |

## OFFICIAL

## OFFICIAL

|     |        |        |          |            |
|-----|--------|--------|----------|------------|
| 544 | 79.48  | 1.82   | 43.67033 | High CBDA  |
| 545 | 80.44  | 2.25   | 35.75111 | High CBDA  |
| 546 | 87.29  | 3.31   | 26.37160 | High CBDA  |
| 547 | 59.31  | 1.23   | 48.21951 | High CBDA  |
| 548 | 96.47  | 2.77   | 34.82671 | High CBDA  |
| 549 | 75.11  | 1.83   | 41.04372 | High CBDA  |
| 550 | 102.46 | 42.43  | 2.41480  | Even Ratio |
| 551 | 54     | 1.15   | 46.95652 | High CBDA  |
| 552 | 69.54  | 1.66   | 41.89157 | High CBDA  |
| 553 | 73.07  | 1.53   | 47.75817 | High CBDA  |
| 554 | 48.47  | 1.01   | 47.99010 | High CBDA  |
| 555 | 72.5   | 1.83   | 39.61749 | High CBDA  |
| 556 | 64.79  | 1.33   | 48.71429 | High CBDA  |
| 557 | 88.06  | 2.4    | 36.69167 | High CBDA  |
| 558 | 121.15 | 2.88   | 42.06597 | High CBDA  |
| 559 | 62.49  | 1.73   | 36.12139 | High CBDA  |
| 560 | 77.73  | 1.55   | 50.14839 | High CBDA  |
| 561 | 66.13  | 1.53   | 43.22222 | High CBDA  |
| 562 | 82.91  | 2.02   | 41.04455 | High CBDA  |
| 563 | 65.34  | 1.45   | 45.06207 | High CBDA  |
| 564 | 56.24  | 1.25   | 44.99200 | High CBDA  |
| 565 | 78.54  | 1.96   | 40.07143 | High CBDA  |
| 566 | 0.6    | 117.11 | 0.00512  | High THCA  |
| 567 | 83.17  | 2.15   | 38.68372 | High CBDA  |
| 568 | 94.58  | 43.87  | 2.15592  | Even Ratio |
| 569 | 97.92  | 2.37   | 41.31646 | High CBDA  |
| 570 | 56.23  | 1.78   | 31.58989 | High CBDA  |
| 571 | 87.12  | 1.9    | 45.85263 | High CBDA  |
| 572 | 68.01  | 1.83   | 37.16393 | High CBDA  |
| 573 | 77.24  | 2.25   | 34.32889 | High CBDA  |
| 574 | 84.21  | 1.79   | 47.04469 | High CBDA  |
| 575 | 53.01  | 1.22   | 43.45082 | High CBDA  |
| 576 | 50.12  | 1.13   | 44.35398 | High CBDA  |
| 577 | 67.04  | 1.9    | 35.28421 | High CBDA  |
| 578 | 76.31  | 1.66   | 45.96988 | High CBDA  |
| 579 | 87.51  | 2.23   | 39.24215 | High CBDA  |
| 580 | 53.11  | 1.19   | 44.63025 | High CBDA  |
| 581 | 59.32  | 1.61   | 36.84472 | High CBDA  |
| 582 | 67.88  | 1.75   | 38.78857 | High CBDA  |
| 583 | 90.77  | 35.04  | 2.59047  | Even Ratio |
| 584 | 70.52  | 2.21   | 31.90950 | High CBDA  |
| 585 | 67.26  | 1.6    | 42.03750 | High CBDA  |
| 586 | 116.9  | 55.71  | 2.09837  | Even Ratio |
| 587 | 86.08  | 2.04   | 42.19608 | High CBDA  |
| 588 | 79.7   | 1.74   | 45.80460 | High CBDA  |
| 589 | 79.37  | 2.45   | 32.39592 | High CBDA  |

## OFFICIAL

## OFFICIAL

|     |       |        |          |            |
|-----|-------|--------|----------|------------|
| 590 | 79.48 | 2.07   | 38.39614 | High CBDA  |
| 591 | 0.26  | 89.01  | 0.00292  | High THCA  |
| 592 | 79.11 | 1.78   | 44.44382 | High CBDA  |
| 593 | 73.02 | 2.08   | 35.10577 | High CBDA  |
| 594 | 66.2  | 1.64   | 40.36585 | High CBDA  |
| 595 | 82.34 | 1.96   | 42.01020 | High CBDA  |
| 596 | 79.55 | 1.94   | 41.00515 | High CBDA  |
| 597 | 94.92 | 2.31   | 41.09091 | High CBDA  |
| 598 | 53.86 | 1.46   | 36.89041 | High CBDA  |
| 599 | 78.83 | 2.17   | 36.32719 | High CBDA  |
| 600 | 80.19 | 2.26   | 35.48230 | High CBDA  |
| 601 | 1.91  | 47.14  | 0.04052  | High THCA  |
| 602 | 60.17 | 1.58   | 38.08228 | High CBDA  |
| 603 | 32.13 | 0.97   | 33.12371 | High CBDA  |
| 604 | 81.08 | 37.89  | 2.13988  | Even Ratio |
| 605 | 62.12 | 1.74   | 35.70115 | High CBDA  |
| 606 | 72.91 | 2.24   | 32.54911 | High CBDA  |
| 607 | 79.8  | 36.8   | 2.16848  | Even Ratio |
| 608 | 0.31  | 146.21 | 0.00212  | High THCA  |
| 609 | 77.07 | 47.63  | 1.61810  | Even Ratio |
| 610 | 68.59 | 48.1   | 1.42599  | Even Ratio |
| 611 | 0.33  | 141.85 | 0.00233  | High THCA  |
| 612 | 58.26 | 1.69   | 34.47337 | High CBDA  |
| 613 | 78.76 | 36.6   | 2.15191  | Even Ratio |
| 614 | 61.3  | 1.68   | 36.48810 | High CBDA  |
| 615 | 60.58 | 1.26   | 48.07937 | High CBDA  |
| 616 | 0.36  | 136.93 | 0.00263  | High THCA  |
| 617 | 60.89 | 2.3    | 26.47391 | High CBDA  |
| 618 | 0.36  | 134.98 | 0.00267  | High THCA  |
| 619 | 61.46 | 1.58   | 38.89873 | High CBDA  |
| 620 | 0.39  | 136.58 | 0.00286  | High THCA  |
| 621 | 63.94 | 1.91   | 33.47644 | High CBDA  |
| 622 | 44.27 | 1.41   | 31.39716 | High CBDA  |
| 623 | 74.54 | 45.16  | 1.65058  | Even Ratio |
| 624 | 70.87 | 2.04   | 34.74020 | High CBDA  |
| 625 | 70.13 | 33.21  | 2.11171  | Even Ratio |
| 626 | 52.07 | 1.35   | 38.57037 | High CBDA  |
| 627 | 62.05 | 1.72   | 36.07558 | High CBDA  |
| 628 | 80.27 | 2.41   | 33.30705 | High CBDA  |
| 629 | 41.81 | 1.33   | 31.43609 | High CBDA  |
| 630 | 75.55 | 2.07   | 36.49758 | High CBDA  |
| 631 | 76.94 | 36.94  | 2.08284  | Even Ratio |
| 632 | 51.6  | 1.48   | 34.86486 | High CBDA  |
| 633 | 71.53 | 32.34  | 2.21181  | Even Ratio |

## OFFICIAL

## OFFICIAL

|     |       |        |          |            |
|-----|-------|--------|----------|------------|
| 634 | 1.15  | 128.41 | 0.00896  | High THCA  |
| 635 | 49.78 | 1.43   | 34.81119 | High CBDA  |
| 636 | 0.79  | 164.48 | 0.00480  | High THCA  |
| 637 | 65.31 | 2.27   | 28.77093 | High CBDA  |
| 638 | 0.37  | 161.79 | 0.00229  | High THCA  |
| 639 | 68.91 | 1.85   | 37.24865 | High CBDA  |
| 640 | 47.89 | 1.42   | 33.72535 | High CBDA  |
| 641 | 0.36  | 135.85 | 0.00265  | High THCA  |
| 642 | 56.54 | 1.57   | 36.01274 | High CBDA  |
| 643 | 68.02 | 48.38  | 1.40595  | Even Ratio |
| 644 | 51.97 | 1.48   | 35.11486 | High CBDA  |
| 645 | 39.48 | 1.17   | 33.74359 | High CBDA  |
| 646 | 77.26 | 2.21   | 34.95928 | High CBDA  |
| 647 | 58.62 | 1.85   | 31.68649 | High CBDA  |
| 648 | 82.46 | 37.98  | 2.17114  | Even Ratio |
| 649 | 61.56 | 3.06   | 20.11765 | High CBDA  |
| 650 | 58.27 | 2.44   | 23.88115 | High CBDA  |
| 651 | 58.9  | 0.77   | 76.49351 | High CBDA  |
| 652 | 55.44 | 1.46   | 37.97260 | High CBDA  |
| 653 | 72.64 | 51.93  | 1.39881  | Even Ratio |
| 654 | 0.45  | 143.23 | 0.00314  | High THCA  |
| 655 | 69.68 | 2.26   | 30.83186 | High CBDA  |
| 656 | 75.69 | 36.76  | 2.05903  | Even Ratio |
| 657 | 62.92 | 1.76   | 35.75000 | High CBDA  |
| 658 | 0.7   | 151.74 | 0.00461  | High THCA  |
| 659 | 51.73 | 1.38   | 37.48551 | High CBDA  |
| 660 | 72.86 | 44.96  | 1.62055  | Even Ratio |
| 661 | 74.82 | 2.12   | 35.29245 | High CBDA  |
| 662 | 72.88 | 51.01  | 1.42874  | Even Ratio |
| 663 | 0.47  | 126.59 | 0.00371  | High THCA  |
| 664 | 50.04 | 1.27   | 39.40157 | High CBDA  |
| 665 | 58.57 | 1.79   | 32.72067 | High CBDA  |
| 666 | 77.61 | 48.61  | 1.59659  | Even Ratio |
| 667 | 72.05 | 1.92   | 37.52604 | High CBDA  |
| 668 | 0.6   | 135.35 | 0.00443  | High THCA  |
| 669 | 0.33  | 128.49 | 0.00257  | High THCA  |
| 670 | 0.49  | 136.28 | 0.00360  | High THCA  |
| 671 | 0.36  | 130.39 | 0.00276  | High THCA  |
| 672 | 62.67 | 1.71   | 36.64912 | High CBDA  |
| 673 | 72.94 | 2.19   | 33.30594 | High CBDA  |
| 674 | 0.21  | 76.28  | 0.00275  | High THCA  |
| 675 | 0.47  | 42.88  | 0.01096  | High THCA  |
| 676 | 0.26  | 65.05  | 0.00400  | High THCA  |
| 677 | 24.45 | 8.43   | 2.90036  | Even Ratio |

## OFFICIAL

## OFFICIAL

|     |        |        |          |            |
|-----|--------|--------|----------|------------|
| 678 | 0.17   | 66.33  | 0.00256  | High THCA  |
| 679 | 0.18   | 67.86  | 0.00265  | High THCA  |
| 680 | 48.54  | 1.67   | 29.03143 | High CBDA  |
| 681 | 70.89  | 2.32   | 30.52028 | High CBDA  |
| 682 | 65.98  | 47.28  | 1.39563  | Even Ratio |
| 683 | 66.33  | 2.12   | 31.34842 | High CBDA  |
| 684 | 0.37   | 133.22 | 0.00280  | High THCA  |
| 685 | 63.74  | 45.70  | 1.39471  | Even Ratio |
| 686 | 67.64  | 2.13   | 31.69652 | High CBDA  |
| 687 | 49.94  | 2.75   | 18.18566 | High CBDA  |
| 688 | 51.38  | 1.63   | 31.57729 | High CBDA  |
| 689 | 57.10  | 1.86   | 30.69544 | High CBDA  |
| 690 | 48.50  | 1.58   | 30.72530 | High CBDA  |
| 691 | 74.79  | 2.53   | 29.58815 | High CBDA  |
| 692 | 43.09  | 1.40   | 30.68182 | High CBDA  |
| 693 | 107.13 | 3.34   | 32.05719 | High CBDA  |
| 694 | 74.14  | 2.43   | 30.50027 | High CBDA  |
| 695 | 60.44  | 1.99   | 30.39605 | High CBDA  |
| 696 | 41.98  | 1.36   | 30.89258 | High CBDA  |
| 697 | 89.96  | 3.03   | 29.70688 | High CBDA  |
| 698 | 46.24  | 1.44   | 32.01017 | High CBDA  |
| 699 | 51.05  | 1.75   | 29.21480 | High CBDA  |
| 700 | 0.60   | 120.42 | 0.00498  | High THCA  |
| 701 | 68.68  | 2.10   | 32.73813 | High CBDA  |
| 702 | 58.30  | 1.82   | 32.01712 | High CBDA  |
| 703 | 57.97  | 1.84   | 31.46065 | High CBDA  |
| 704 | 32.37  | 1.29   | 25.05811 | High CBDA  |
| 705 | 56.20  | 1.76   | 32.00284 | High CBDA  |
| 706 | 60.95  | 2.04   | 29.85122 | High CBDA  |
| 707 | 59.09  | 1.89   | 31.30995 | High CBDA  |
| 708 | 40.62  | 1.29   | 31.52531 | High CBDA  |
| 709 | 39.95  | 1.39   | 28.78886 | High CBDA  |
| 710 | 53.86  | 1.77   | 30.47047 | High CBDA  |
| 711 | 0.39   | 121.25 | 0.00325  | High THCA  |
| 712 | 41.05  | 1.50   | 27.43202 | High CBDA  |
| 713 | 70.99  | 51.53  | 1.37778  | Even Ratio |
| 714 | 91.75  | 3.75   | 24.44594 | High CBDA  |
| 715 | 0.36   | 123.02 | 0.00292  | High THCA  |
| 716 | 68.63  | 50.07  | 1.37049  | Even Ratio |
| 717 | 71.84  | 2.54   | 28.23700 | High CBDA  |
| 718 | 64.11  | 2.07   | 30.95520 | High CBDA  |
| 719 | 60.18  | 2.11   | 28.57159 | High CBDA  |
| 720 | 54.99  | 2.01   | 27.31365 | High CBDA  |
| 721 | 58.32  | 1.89   | 30.79401 | High CBDA  |
| 722 | 51.78  | 1.70   | 30.44904 | High CBDA  |
| 723 | 43.86  | 1.42   | 30.94707 | High CBDA  |

## OFFICIAL



OFFICIAL

|     |       |      |          |           |
|-----|-------|------|----------|-----------|
| 724 | 30.36 | 1.00 | 30.29361 | High CBDA |
| 725 | 75.26 | 2.43 | 30.97377 | High CBDA |
| 726 | 84.36 | 2.80 | 30.16078 | High CBDA |
| 727 | 42.93 | 1.63 | 26.30952 | High CBDA |
| 728 | 89.69 | 3.04 | 29.48351 | High CBDA |
| 729 | 44.22 | 1.55 | 28.55198 | High CBDA |
| 730 | 36.35 | 1.16 | 31.24010 | High CBDA |
